# Supplementary material for: Copper complexes for the chemoselective N-arylation of arylamines and sulfanilamides via Chan–Evans–Lam cross-coupling
Source: Royal Society of Chemistry journal article supplement (doi:10.1039/d3dt02659k), 2023-01-01
Supplement: d3dt02659k1.pdf [file d3dt02659k1.pdf]

## Supplementary Information

### **Copper–complexes for Chemoselective N-arylation of Arylamines and Sulfanilamides via Chan-Evans-Lam Cross-Coupling**

Selvam Raju,<sup>a,\*</sup> Mohsen Teimouri,<sup>a</sup> Bhupendra Adhikari,<sup>a</sup> Bruno Donnadieu,<sup>a</sup> Sean L. Stokes,<sup>a,\*</sup> and Joseph P. Emerson<sup>a,\*</sup>

<sup>a</sup>*Department of Chemistry, Mississippi State University, Mississippi State, MS 39762, United States*

*Corresponding author Email: [jemerson@chemistry.msstate.edu](mailto:jemerson@chemistry.msstate.edu)*

## Table of Contents

|          |                                                                                                                                                  |       |
|----------|--------------------------------------------------------------------------------------------------------------------------------------------------|-------|
| <b>A</b> | Procedure for the synthesis of ligand <b>BIM</b> , and <b>BIMA</b>                                                                               | 3-4   |
| <b>B</b> | $\text{Cu}^{2+}$ —Complexes synthesis of $\text{Cu}^{2+}\text{BIM}$ & $\text{Cu}^{2+}\text{BIMA}$                                                | 5     |
| <b>C</b> | FT-IR Spectra of $\text{Cu}^{2+}\text{BIM}$ & $\text{Cu}^{2+}\text{BIMA}$                                                                        | 6     |
| <b>D</b> | General procedure for chemoselectivity of sulfonamide C-N bond activation by Copper(II) catalyzed Chan-Evans-Lam cross-coupling ( <b>3a-3k</b> ) | 8     |
| <b>E</b> | General procedure for chemoselectivity of aniline C-N bond activation by Copper(II) catalyzed Chan-Evans-Lam cross-coupling ( <b>4a-f</b> )      | 9     |
| <b>F</b> | General procedure for N-nucleophile involved C-N bond activation by Copper(II) catalyzed Chan-Evans-Lam cross-coupling ( <b>CN1-CN16</b> )       | 9     |
| <b>G</b> | Spectroscopic and physical data of all compounds ( <b>3a-3k</b> , <b>4a-4f</b> , and <b>CN1-CN16</b> )                                           | 10-23 |
| <b>H</b> | NMR data                                                                                                                                         | 24-25 |
| <b>I</b> | Single crystal XRD data table and figures                                                                                                        | 26-37 |
| <b>J</b> | Computational output files for $[\text{Cu}(\text{BIM})(\text{H}_2\text{O})_2]^{2+}$ & $[\text{Cu}(\text{BIMA})(\text{H}_2\text{O})_2]^{2+}$      | 38-48 |
| <b>K</b> | Scheme S1. Control Experiments                                                                                                                   | 49-50 |
| <b>L</b> | Base effects on % conversion                                                                                                                     | 50    |
| <b>M</b> | Powder X-ray diffraction (PXRD) analysis for $\text{Cu}^{2+}\text{BIM}$ & $\text{Cu}^{2+}\text{BIMA}$                                            | 52-55 |
| <b>N</b> | Elemental analysis and HRMS data for $\text{Cu}^{2+}\text{BIM}$ & $\text{Cu}^{2+}\text{BIMA}$                                                    | 56-57 |
| <b>O</b> | References                                                                                                                                       | 58-59 |

## A. Procedure for the synthesis of ligand BIM, and BIMA

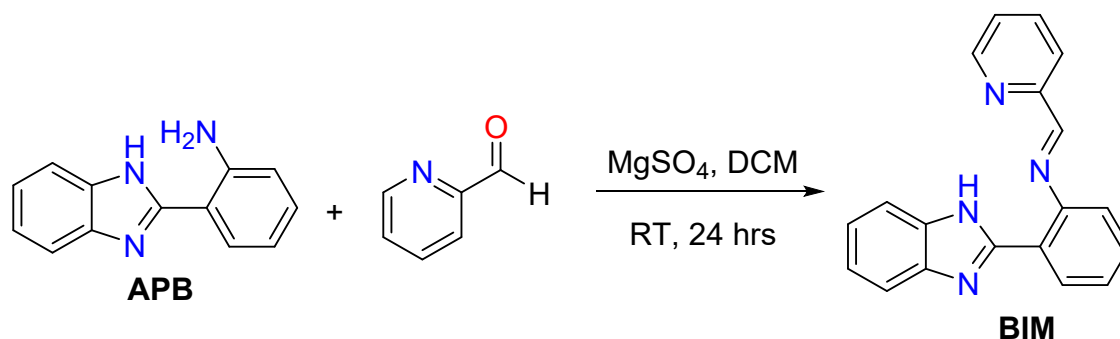

**Ligand-BIM synthesis:** A 25 mL round-bottom (RB) flask was charged with a magnetic stir bar, 2.0 mmol of 2-(2-aminophenyl)-1H-benzimidazole (APB), 2.2 mmol of 2-pyridine carboxaldehyde, and 10.0 mmol of  $\text{MgSO}_4$ . This mixture was solvated in 10.0 mL of dichloromethane (DCM) and the reaction was left to stir for approximately 9 hours under an  $N_2$  atmosphere at room temperature in a closed with a septum. After stirring, the reaction progress was monitored through TLC. Upon the completion of the precursors, the reaction mixture was filtered through celite. Evaporation of the solvent and subsequent purification by washing with DCM and n-hexane afforded the pale-yellow solid of BIM in 95% yields. This compound is known and  $^1\text{H-NMR}$  data matches with reported spectra.<sup>1</sup> Yield 95% (450.0 mg), White solid, m.p. 230–232 °C;  $^1\text{H NMR}$  (500 MHz,  $\text{DSMO-}d_6$ )  $\delta$  8.44 (d,  $J = 4.4$  Hz, 1H), 7.90 (d,  $J = 7.6$  Hz, 1H), 7.72 (t,  $J = 7.4$  Hz, 1H), 7.69 (s, 1H), 7.64 (d,  $J = 8.0$  Hz, 1H), 7.32 (d,  $J = 8.0$  Hz, 1H), 7.30–7.09 (m, 6H), 6.84 (d,  $J = 8.2$  Hz, 1H), 6.79 (t,  $J = 7.2$  Hz, 1H) ppm.

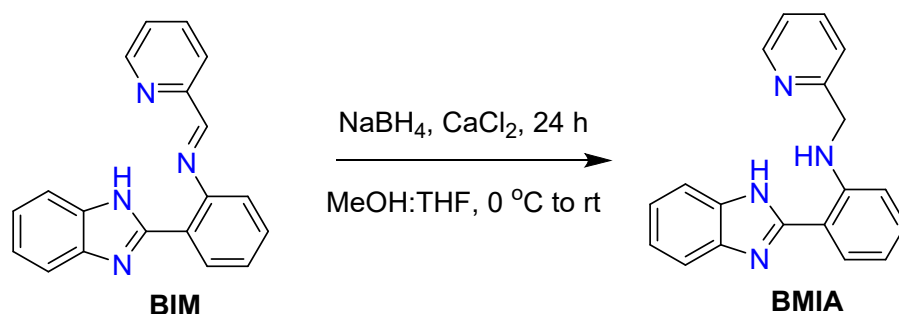

**Ligand-BIMA synthesized from BIM:** A 25 mL round-bottom (RB) flask was charged with a magnetic stir bar, 1.0 mmol of BIM, and 5.0 mL of 3:1 solvent (MeOH: THF) were added. The reaction mixture was stirred at 0°C temperature for 1 hour. Then, 2.5 mmol of  $\text{NaBH}_4$  was added slowly twice at 12 hours intervals. The resulting solution was left to stir for 24 hours under

an  $N_2$  atmosphere at rt. Upon the completion of the precursors, the reaction mixture was diluted with 20.0 mL of water and extracted with ethyl acetate and washed with 2% of  $\text{NaHCO}_3$  and brine solution. The organic layers were evaporated under reduced pressure and subsequent purification by column chromatography on silica gel afforded the pale-yellowish product (**BIMA**, 61%) in yields. Yield 61% (180.0 mg), White solid, m.p. 254–256 °C;  $R_f = 0.46$  (HX/EA = 1:2);  $^1\text{H}$  NMR (500 MHz,  $\text{DMSO}-d_6$ )  $\delta$  12.8 (s, 1H), 9.83 (t,  $J = 5.5$  Hz, 1H), 8.59 (d,  $J = 4.5$  Hz, 1H), 7.96 (d,  $J = 7.5$  Hz, 1H), 7.76 (t,  $J = 7.5$  Hz, 1H), 7.70 (d,  $J = 7.5$  Hz, 1H), 7.55 (d,  $J = 7.5$  Hz, 1H), 7.40 (d,  $J = 7.5$  Hz, 1H), 7.28–7.19 (m, 4H), 6.74 (t,  $J = 8.0$  Hz, 2H), 4.68 (d,  $J = 6.0$  Hz, 2H) ppm;  $^{13}\text{C}$  NMR (125 MHz,  $\text{DMSO}-d_6$ )  $\delta$  159.7, 152.8, 149.6, 147.8, 143.2, 137.3, 134.0, 131.4, 128.1, 123.1, 122.6, 122.0, 121.5, 118.7, 115.6, 111.9, 111.5, 111.3, 48.7 ppm; FT-IR (KBr)  $\tilde{\nu}$  ( $\text{cm}^{-1}$ ) 3340, 3325, 1615, 1545, 1360, 1210; HRMS (ESI)  $m/z$ :  $[\text{M}+\text{H}]^+$  Calcd for  $\text{C}_{19}\text{H}_{17}\text{N}_4$  301.1448; Found 301.1438.

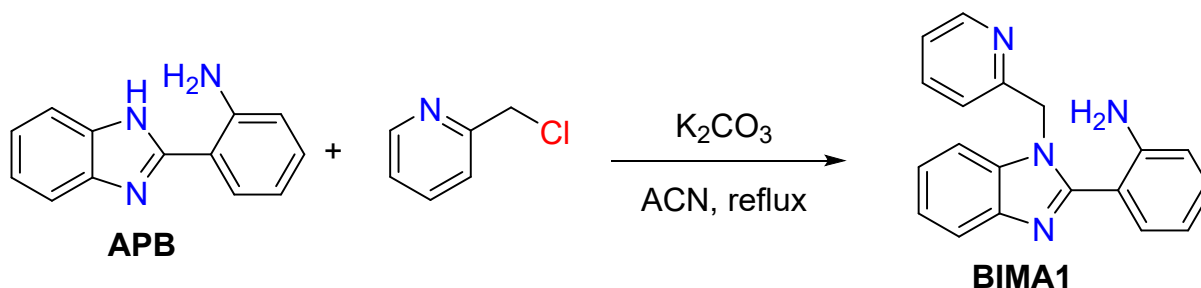

**Ligand-BIMA1 synthesis:** A 50 mL round-bottom (RB) flask was charged with a magnetic stir bar, 2.0 mmol of 2-(2-aminophenyl)-1H-benzimidazole (**APB**), 8.0 mmol of  $\text{K}_2\text{CO}_3$ , and 15.0 mL of acetonitrile (ACN) were added. The resulting reaction mixture was stirred at ambient temperature for 1 hour followed by reflux. Then, 3.0 mmol of 2-(chloromethyl)pyridine hydrochloride was solvated in 5.0 mL of ACN, and the solution was added dropwise and left to stir for 24 hours under an  $N_2$  atmosphere at refluxing. Upon the completion of the reaction time, the reaction mixture was filtered through celite. Evaporation of the solvent and subsequent purification by column chromatography on silica gel afforded the oily product of **BIMA1** in 57% yields. Yield 57% (220.0 mg), White solid, m.p. 240–242 °C;  $R_f = 0.36$  (HX/EA = 1:3);  $^1\text{H}$  NMR (500 MHz,  $\text{CDCl}_3$ )  $\delta$  8.56 (d,  $J = 4.0$  Hz, 1H), 7.82 (d,  $J = 8.0$  Hz, 1H), 7.54 (td,  $J = 2.0, 8.0$  Hz, 1H), 7.29–7.25 (m, 1H), 7.21–7.12 (m, 5H), 6.87 (d,  $J = 8.0$  Hz, 1H), 6.77 (d,  $J = 8.4$  Hz, 1H), 6.67 (t,  $J = 7.4$  Hz, 1H), 5.48 (s, 2H), 4.94 (s, 2H) ppm;  $^{13}\text{C}$  NMR (125 MHz,  $\text{CDCl}_3$ )  $\delta$  156.0, 152.5, 149.5, 147.0, 142.7, 137.0, 135.0, 130.8, 129.6, 122.8, 122.5, 120.4, 119.3, 117.1, 116.4, 112.9, 110.3, 50.2 ppm; FT-IR (KBr)  $\tilde{\nu}$  ( $\text{cm}^{-1}$ ) 3410, 1920, 1675, 1540, 1320, 1250; HRMS (ESI)  $m/z$ :  $[\text{M}+\text{H}]^+$  Calcd for  $\text{C}_{19}\text{H}_{17}\text{N}_4$  301.1448; Found 301.1440.

## B. Cu<sup>2+</sup>—Complexes synthesis Cu<sup>2+</sup>BIM & Cu<sup>2+</sup>BIMA

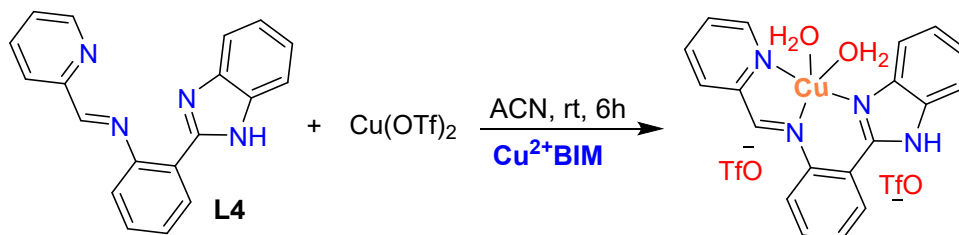

**Cu<sup>2+</sup>BIM synthesis:** A 25.0 mL round-bottom (RB) flask was equipped with a stirring bar and charged with 1.0 mmol of **BIM**, 1.0 mmol of Cu(OTf)<sub>2</sub>, and solvated with 5.0 mL of ACN solvent. The mixture was stirred at ambient temperature for 6h, and then ACN was removed in *vacuo*. After, the precipitate was washed with methanol and *n*-hexane (1:2) to afford the Cu<sup>2+</sup>**BIM** in light-green color powder. Cu<sup>2+</sup>**BIM** could be crystallized in ACN and DCM.

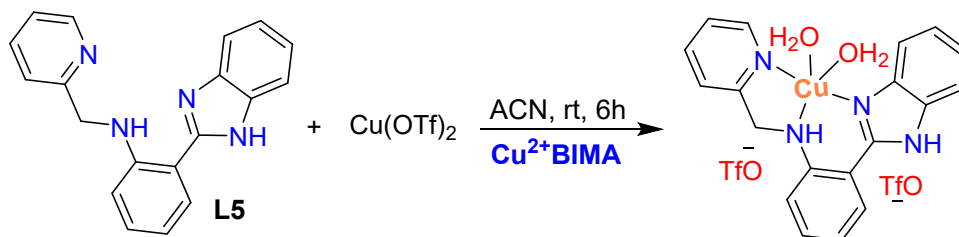

**Cu<sup>2+</sup>BIMA synthesis:** A 25.0 mL round-bottom (RB) flask was equipped with a stirring bar and charged with 1.0 mmol of **BIMA**, 1.0 mmol of Cu(OTf)<sub>2</sub>, and solvated with 5.0 mL of ACN solvent. The mixture was stirred at ambient temperature for 6h, and then ACN was removed in *vacuo*. After, the precipitate was washed with *n*-hexane to afford the Cu<sup>2+</sup>**BIMA** in light-green color powder.

### C. FT-IR Spectra

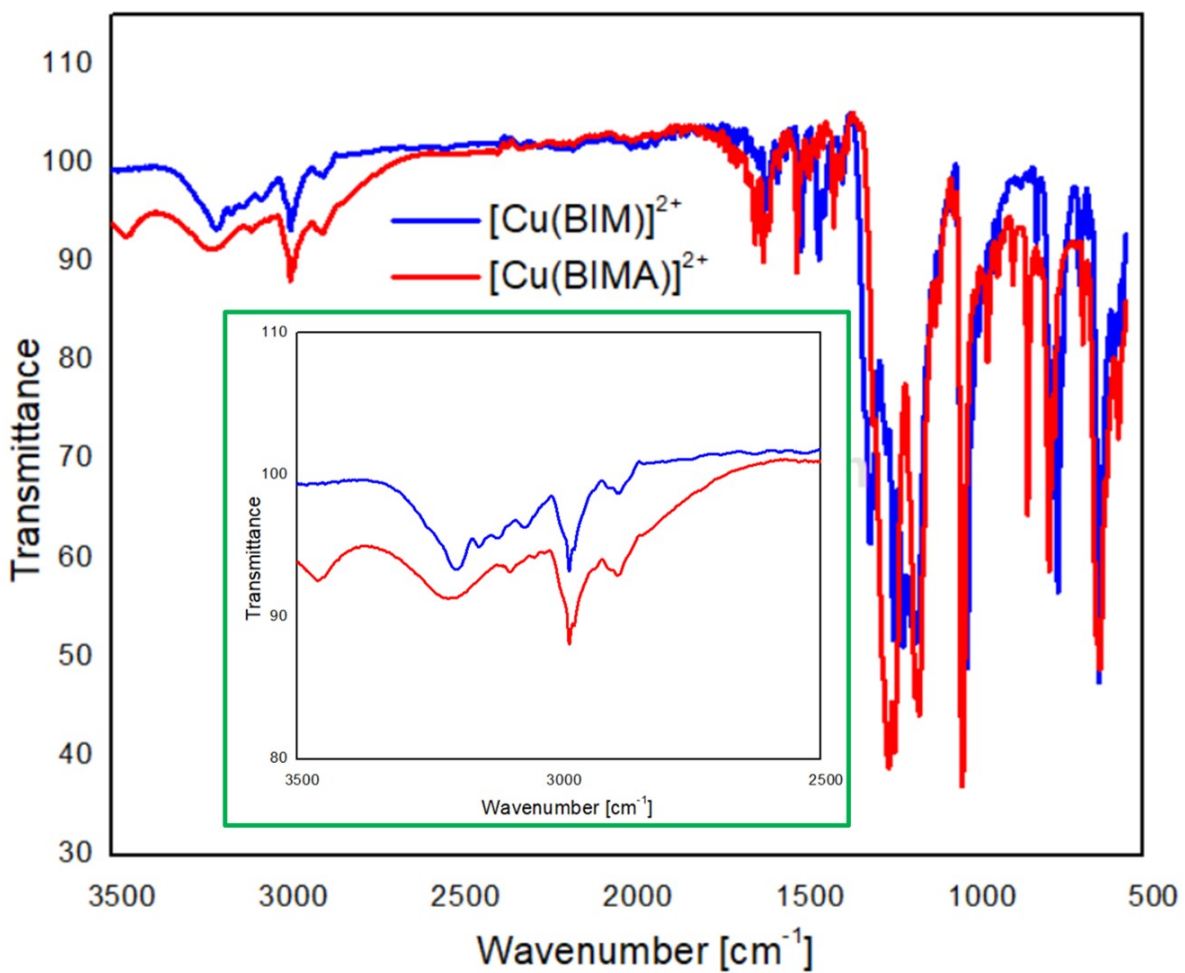

**Figure S1.** FT-IR comparison spectra of Cu<sup>2+</sup>BIM & Cu<sup>2+</sup>BIMA

**Table S1.** Copper catalyst and some solvent optimization yields for the C—N arylation of 4ABSA.

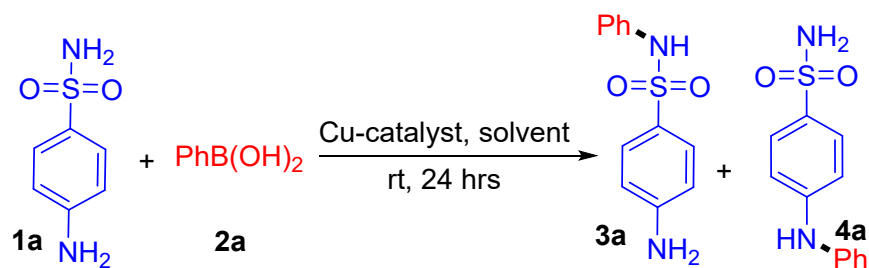

| entry | catalyst              | solvent          | 3a% | 4a% |
|-------|-----------------------|------------------|-----|-----|
| 1     | CuCl                  | DCM              | ND  | ND  |
| 2     | CuCl <sub>2</sub>     | DCM              | ND  | ND  |
| 3     | CuBr                  | DCM              | ND  | ND  |
| 4     | CuI                   | DCM              | ND  | ND  |
| 5     | Cu(OAc) <sub>2</sub>  | DCM              | ND  | <5  |
| 6     | Cu(OTf) <sub>2</sub>  | DCM              | 12  | ND  |
| 7     | Cu <sup>2+</sup> BIM  | DCM              | 42  | 6   |
| 8     | Cu <sup>2+</sup> BIMA | DCM              | 32  | 12  |
| 9     | Cu <sup>2+</sup> BIM  | CB               | <15 | ND  |
| 10    | Cu <sup>2+</sup> BIM  | DCE              | 28  | ND  |
| 11    | Cu <sup>2+</sup> BIM  | DMF              | 25  | <5  |
| 12    | Cu <sup>2+</sup> BIM  | D.S              | ND  | ND  |
| 13    | Cu <sup>2+</sup> BIM  | MeOH             | 41  | ND  |
| 14    | Cu <sup>2+</sup> BIM  | EtOH             | 37  | ND  |
| 15    | Cu <sup>2+</sup> BIM  | TFE              | 36  | ND  |
| 16    | Cu <sup>2+</sup> BIM  | H <sub>2</sub> O | 42  | ND  |

Reaction Conditions: 4ABSA (**1a**, 0.5 mmol),  $\text{PhB(OH)}_2$  (**2a**, 1.5 equiv.), and Cu<sup>+</sup>/Cu<sup>2+</sup>-catalyst (10 mol%) in solvent (5.0 mL) at RT under an open-air atmosphere for 24 hours. Yields were determined using <sup>1</sup>H-NMR spectroscopy with mesitylene as an internal standard. Note: D.S: DMSO, THF, EtOAc, 1,4-dioxane, and toluene; ND: Not Detected

We initiated this CEL coupling process and its dependence on varying the Cu<sup>+</sup> & Cu<sup>2+</sup> sources with different counter-anions and ligands. Table S1, entries 1-5 sets a baseline for CEL reactivity with Cu<sup>+</sup>/Cu<sup>2+</sup> by changing the anions such as chloride (Cl<sup>-</sup>), bromide (Br<sup>-</sup>), iodide (I<sup>-</sup>), and acetate (AcO<sup>-</sup>), where these salts performed poorly. Later, we changed to triflate (TfO<sup>-</sup>) showing a low conversion of 12% (Table S1, entry 6). We found that with the addition of ligand improved catalysis stability and resulted in increased amounts of product formation (Table S1, entry 7-16). Under early conditions, Cu<sup>2+</sup>BIM was found to catalyze arylation of the sulfonamide with a yield of 42% with good selectivity toward **3a** over **4a**. Cu<sup>2+</sup>BIM showed approximately 7-times the reactivity toward *N*-arylation of the sulfonamide functional group over the amino substituent. Cu<sup>2+</sup>BIMA showed promising reactivity, where yields of 32% of **3a** and 12% of **4a** were recorded, but lacked the selectivity afforded by the BIM system. Due to this observation the Cu<sup>2+</sup>BIM was selected for further optimization. When comparing Cu<sup>2+</sup>BIM with other solvents such as chlorobenzene (CB), dichloroethane (DCE), *N,N*-dimethylformamide (DMF), dimethyl sulfoxide (DMSO), tetrahydrofuran (THF), ethyl acetate (EtOAc), 1,4-dioxane, toluene, methanol (MeOH), ethanol (EtOH), 2,2,2-trifluoroethanol (TFE), and water; both methanol and water afforded comparable yields that offered a higher degree of regioselectivity than in DCM (Table S1, entries 9-16).

#### D. General procedure for chemoselectivity of sulfonamide C-N bond activation by Copper(II) catalyzed Chan-Evans-Lam cross-coupling (**3a-3k**)

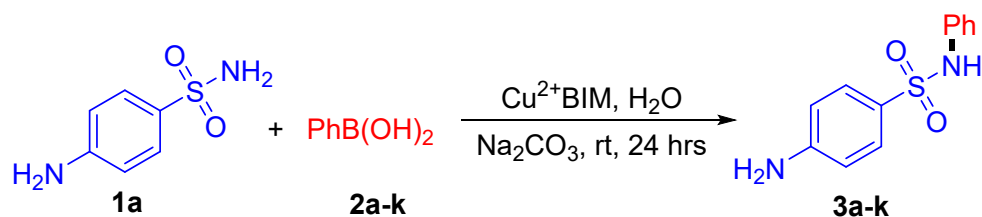

A 20 mL vial was charged with a magnetic stir bar, 0.75 mmol of phenylboronic acid (**2a-2k**), 0.5 mmol of sulfonamides (**1a**), 1.0 mmol of sodium carbonate (Na<sub>2</sub>CO<sub>3</sub>), and 0.05 mmol of Cu<sup>2+</sup>BIM. This mixture was solvated in 5.0 mL of water (H<sub>2</sub>O) and the reaction was left to stir for approximately 24 hours under an air atmosphere at room temperature. After the completion of the reaction time, the resulting reaction mixture was diluted with ethyl acetate and extracted. The



organic layers were evaporated under reduced pressure and subsequent purification by column chromatography on silica gel afforded the desired products (**3a-k**, 81-31%).

#### E. General procedure for chemoselectivity of aniline C-N bond activation by Copper(II) catalyzed Chan-Evans-Lam cross-coupling (**4a-f**)

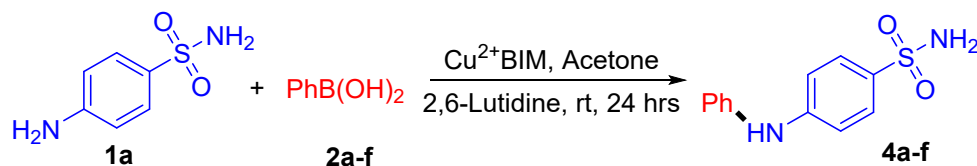

A 20 mL vial was charged with a magnetic stir bar, 0.75 mmol of phenylboronic acid (**2a-2f**), 0.5 mmol of sulfonamides (**1a**), 1.0 mmol of 2,6-Lutidine, and 0.05 mmol of  $\text{Cu}^{2+}\text{BIM}$ . This mixture was solvated in 5.0 mL of acetone and the reaction was left to stir for approximately 24 hours under an air atmosphere at room temperature in a septum capped with a needle. After the completion of the reaction time, the resulting reaction mixture was filtered through celite. The organic layers were evaporated under reduced pressure and subsequent purification by column chromatography on silica gel afforded the desired products (**4a-f**, 71-51%).

#### F. General procedure for *N*-nucleophile involved C-N bond activation by Copper(II) catalyzed Chan-Evans-Lam cross-coupling (CN1-CN16)

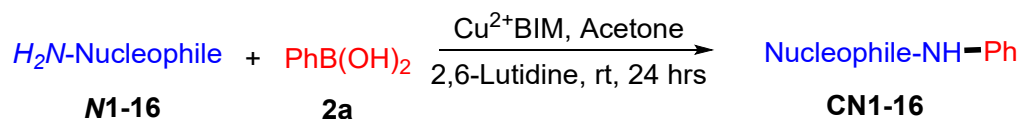

A 20 mL vial was charged with a magnetic stir bar, 0.75 mmol of phenylboronic acid (**2a**), 0.5 mmol of *N*-nucleophiles (**N1-N16**), 1.0 mmol of 2,6-Lutidine, and 0.05 mmol of  $\text{Cu}^{2+}\text{BIM}$ . This mixture was solvated in 5.0 mL of acetone and the reaction was left to stir for approximately 24 hours under an air atmosphere at room temperature in a septum capped with a needle. After the completion of the reaction time, the resulting reaction mixture was filtered through celite, washed with 1% of HCl, and extracted with ethyl acetate. The organic layers were evaporated under reduced

pressure and subsequent purification by column chromatography on silica gel afforded the desired products (CN1-CN16, 92-31%).

***N*-Nucleophiles used for the CEL cross-coupling reaction:** Aniline (N1, CAS No: 62-53-3); Carbazole (N2, CAS No: 86-74-8); 2-Aminobenzyl alcohol (N3, CAS No: 5344-90-1); 8-Aminoquinoline (N4, CAS No: 578-66-5); 2-Nitroimidazole (N5, CAS No: 527-73-1); Benzimidazole (N6, CAS No: 51-17-2); Phthalimide (N7, CAS No: 85-41-6); 2-Phenylbenzimidazole (N8, CAS No: 716-79-0); 4-Aminophenol (N9, CAS No: 123-30-8); Benzamide (N10, CAS No: 55-21-0); 1-(3-Aminopropyl)imidazole (N11, CAS No: 5036-48-6); 4-Methyl-2-phenylimidazole (N12, CAS No: 827-43-0); 1-Naphthylamine (N13, CAS No: 134-32-7); 2-Phenylimidazole (N14, CAS No: 670-96-2); Benzylamine (N15, CAS No: 100-46-9); 6-Thioguanine (N16, CAS No: 154-42-7).

## G. Spectroscopic and physical data of all compounds (3a-3k, 4a-4f, and CN1-CN16)

### 4-amino-*N*-phenylbenzenesulfonamide (3a)

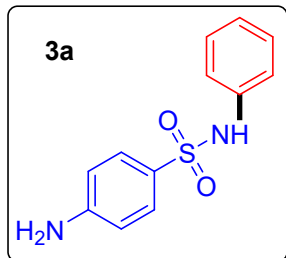

The compound **1a** (0.5 mmol, 94.0 mg), phenylboronic acid (**2a**, 0.75 mmol, 92.0 mg), Na<sub>2</sub>CO<sub>3</sub> (1.0 mmol, 106.0 mg), Cu<sup>2+</sup>BIM (0.05 mmol, 17.0 mg) were dissolved in H<sub>2</sub>O (5.0 mL) in a 25.0 mL boiling tube. The resulting reaction mixture was stirred for 24 h at rt. The reaction was extracted with ethyl acetate and the solvent was removed under vacuum. This compound is known and <sup>1</sup>H-NMR data matches with reported spectra.<sup>2</sup> Yield 78%, White solid; <sup>1</sup>H NMR (500 MHz, DMSO-*d*<sub>6</sub>) δ 9.82 (s, 1H), 7.38 (d, *J* = 8.4 Hz, 2H), 7.17–7.12 (m, 2H), 7.09–7.01 (m, 2H), 6.69 (t, *J* = 7.6 Hz, 1H), 6.54 (d, *J* = 8.8 Hz, 2H), 5.95 (s, 2H) ppm.

### 4-amino-*N*-(*p*-tolyl)benzenesulfonamide (3b)

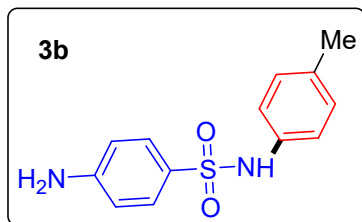

The compound **1a** (0.5 mmol, 94.0 mg), 4-tolylboronic acid (**2b**, 0.75 mmol, 100.0 mg),  $\text{Na}_2\text{CO}_3$  (1.0 mmol, 106.0 mg),  $\text{Cu}^{2+}\text{BIM}$  (0.05 mmol, 17.0 mg) were dissolved in  $\text{H}_2\text{O}$  (5.0 mL) in a 25.0 mL boiling tube. The resulting reaction mixture was stirred for 24 h at rt, the reaction was extracted with ethyl acetate and the solvent was removed under vacuum. This compound is known and  $^1\text{H-NMR}$  data matches with reported spectra.<sup>2</sup> Yield 61%, White solid;  $^1\text{H NMR}$  (500 MHz,  $\text{DMSO-}d_6$ )  $\delta$  9.62 (s, 1H), 7.31 (d,  $J = 8.4$  Hz, 2H), 7.02–6.92 (m, 4H), 6.50 (d,  $J = 8.8$  Hz, 2H), 5.93 (s, 2H), 2.16 (s, 3H) ppm.

#### 4-amino-*N*-(4-*tert*-butylphenyl)benzenesulfonamide (**3c**)<sup>2</sup>

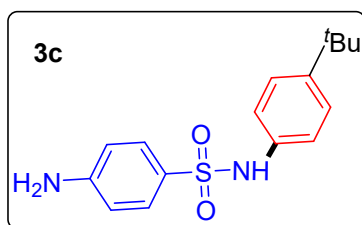

The compound **1a** (0.5 mmol, 94.0 mg), 4-*tert*-butylphenylboronic acid (**2c**, 0.75 mmol, 135.0 mg),  $\text{Na}_2\text{CO}_3$  (1.0 mmol, 106.0 mg),  $\text{Cu}^{2+}\text{BIM}$  (0.05 mmol, 17.0 mg) were dissolved in  $\text{H}_2\text{O}$  (5.0 mL) in a 25.0 mL boiling tube. The resulting reaction mixture was stirred for 24 h at rt, the reaction was extracted with ethyl acetate and the solvent was removed under vacuum. This compound is known and  $^1\text{H-NMR}$  data matches with reported spectra. Yield 64%, White solid;  $^1\text{H NMR}$  (500 MHz,  $\text{DMSO-}d_6$ )  $\delta$  9.75 (s, 1H), 7.37 (d,  $J = 8.8$  Hz, 2H), 7.18 (d,  $J = 8.8$  Hz, 2H), 6.98 (d,  $J = 8.8$  Hz, 2H), 6.54 (d,  $J = 8.8$  Hz, 2H), 5.52 (s, 2H), 1.21 (s, 9H) ppm.

#### 4-amino-*N*-(4-methoxyphenyl)benzenesulfonamide (**3d**)

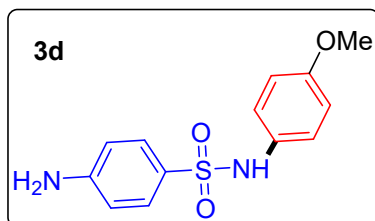

The compound **1a** (0.5 mmol, 94.0 mg), 4-methoxyphenylboronic acid (**2d**, 0.75 mmol, 112.0 mg), Na<sub>2</sub>CO<sub>3</sub> (1.0 mmol, 106.0 mg), Cu<sup>2+</sup>BIM (0.05 mmol, 17.0 mg) were dissolved in H<sub>2</sub>O (5.0 mL) in a 25.0 mL boiling tube. The resulting reaction mixture was stirred for 24 h at rt, the reaction was extracted with ethyl acetate and the solvent was removed under vacuum. This compound is known and <sup>1</sup>H-NMR data matches with reported spectra.<sup>3</sup> Yield 50%, White solid; <sup>1</sup>H NMR (500 MHz, DMSO-*d*<sub>6</sub>) δ 9.42 (s, 1H), 7.31 (d, *J* = 8.8 Hz, 2H), 6.94 (d, *J* = 8.8 Hz, 2H), 6.71 (d, *J* = 8.8 Hz, 2H), 6.50 (d, *J* = 8.8 Hz, 2H), 5.86 (s, 2H), 3.66 (s, 3H) ppm.

#### 4-amino-*N*-(4-fluorophenyl)benzenesulfonamide (**3e**)

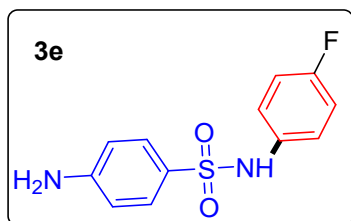

The compound **1a** (0.5 mmol, 94.0 mg), 4-fluorophenylboronic acid (**2e**, 0.75 mmol, 106.0 mg), Na<sub>2</sub>CO<sub>3</sub> (1.0 mmol, 106.0 mg), Cu<sup>2+</sup>BIM (0.05 mmol, 17.0 mg) were dissolved in H<sub>2</sub>O (5.0 mL) in a 25.0 mL boiling tube. The resulting reaction mixture was stirred for 24 h at rt, the reaction was extracted with ethyl acetate and the solvent was removed under vacuum. This compound is known and <sup>1</sup>H-NMR data matches with reported spectra.<sup>2</sup> Yield 50%, White solid; <sup>1</sup>H NMR (500 MHz, DMSO-*d*<sub>6</sub>) δ 9.79 (s, 1H), 7.31 (d, *J* = 8.8 Hz, 2H), 7.01 (d, *J* = 7.0 Hz, 4H), 6.52 (d, *J* = 8.6 Hz, 2H), 5.98 (s, 2H) ppm.

#### 4-amino-*N*-(4-chlorophenyl)benzenesulfonamide (**3f**)

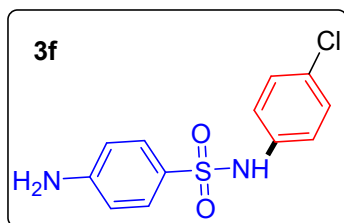

The compound **1a** (0.5 mmol, 94.0 mg), 4-chlorophenylboronic acid (**2f**, 0.75 mmol, 115.0 mg), Na<sub>2</sub>CO<sub>3</sub> (1.0 mmol, 106.0 mg), Cu<sup>2+</sup>BIM (0.05 mmol, 17.0 mg) were dissolved in H<sub>2</sub>O (5.0 mL) in a 25.0 mL boiling tube. The resulting reaction mixture was stirred for 24 h at rt, the reaction was extracted with ethyl acetate and the solvent was removed under vacuum. This compound is known and <sup>1</sup>H-NMR data matches with reported spectra.<sup>2</sup> Yield 59%, White solid; <sup>1</sup>H NMR (500 MHz, DMSO-*d*<sub>6</sub>) δ 9.98 (s, 1H), 7.45–7.33 (m, 2H), 7.31–7.27 (m, 2H), 7.05 (d, *J* = 8.8 Hz, 2H), 6.51 (d, *J* = 7.4 Hz, 2H), 5.98 (s, 2H) ppm.

#### 4-amino-*N*-(4-bromophenyl)benzenesulfonamide (**3g**)

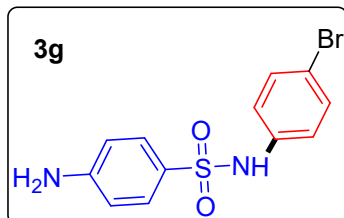

The compound **1a** (0.5 mmol, 94.0 mg), 4-bromophenylboronic acid (**2g**, 0.75 mmol, 150.0 mg), Na<sub>2</sub>CO<sub>3</sub> (1.0 mmol, 106.0 mg), Cu<sup>2+</sup>BIM (0.05 mmol, 17.0 mg) were dissolved in H<sub>2</sub>O (5.0 mL) in a 25.0 mL boiling tube. The resulting reaction mixture was stirred for 24 h at rt, the reaction was extracted with ethyl acetate and the solvent was removed under vacuum. This compound is known and <sup>1</sup>H-NMR data matches with reported spectra.<sup>4</sup> Yield 50%, White solid; <sup>1</sup>H NMR (500 MHz, DMSO-*d*<sub>6</sub>) δ 10.01 (s, 1H), 7.27 (d, *J* = 9.2 Hz, 2H), 7.21 (d, *J* = 9.6 Hz, 2H), 7.00 (d, *J* = 8.8 Hz, 2H), 6.49 (d, *J* = 8.8 Hz, 2H), 5.97 (s, 2H) ppm.

#### 4-amino-*N*-(4-cyanophenyl)benzenesulfonamide (**3h**)

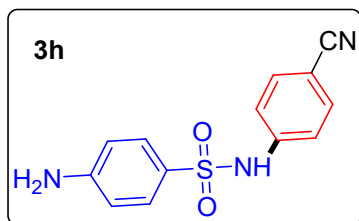

The compound **1a** (0.5 mmol, 94.0 mg), 4-cyanophenylboronic acid (**2h**, 0.75 mmol, 110.0 mg), Na<sub>2</sub>CO<sub>3</sub> (1.0 mmol, 106.0 mg), Cu<sup>2+</sup>BIM (0.05 mmol, 17.0 mg) were dissolved in H<sub>2</sub>O (5.0 mL) in a 25.0 mL boiling tube. The resulting reaction mixture was stirred for 24 h at rt, the reaction was extracted with ethyl acetate and the solvent was removed under vacuum. This compound is known and <sup>1</sup>H-NMR data matches with reported spectra.<sup>5</sup> Yield 61%, Off-white solid; <sup>1</sup>H NMR (500 MHz, DMSO-*d*<sub>6</sub>) δ 9.34 (s, 1H), 7.56–7.41 (m, 2H), 7.38–6.32 (m, 2H), 6.60–6.56 (m, 2H), 6.62 (d, *J* = 8.8 Hz, 2H), 5.51 (s, 2H) ppm.

#### 4-amino-*N*-(4-(trifluoromethyl)phenyl)benzenesulfonamide (**3i**)

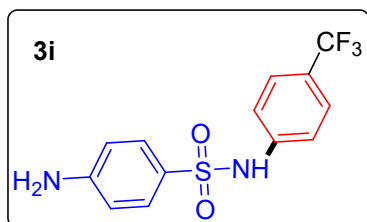

The compound **1a** (0.5 mmol, 94.0 mg), 4-(trifluoromethyl)benzeneboronic acid (**2i**, 0.75 mmol, 140.0 mg),  $\text{Na}_2\text{CO}_3$  (1.0 mmol, 106.0 mg),  $\text{Cu}^{2+}\text{BIM}$  (0.05 mmol, 17.0 mg) were dissolved in  $\text{H}_2\text{O}$  (5.0 mL) in a 25.0 mL boiling tube. The resulting reaction mixture was stirred for 24 h at rt, the reaction was extracted with ethyl acetate and the solvent was removed under vacuum. This compound is known and  $^1\text{H-NMR}$  data matches with reported spectra.<sup>3</sup> Yield 60%, White solid;  $^1\text{H NMR}$  (500 MHz,  $\text{DMSO-}d_6$ )  $\delta$  10.50 (s, 1H), 7.56 (d,  $J = 8.8$  Hz, 2H), 7.45–7.39 (m, 2H), 7.23 (d,  $J = 8.8$  Hz, 2H), 6.60–6.56 (m, 2H), 6.05 (s, 2H) ppm.

#### 4-amino-*N*-(4-nitrophenyl)benzenesulfonamide (**3j**)

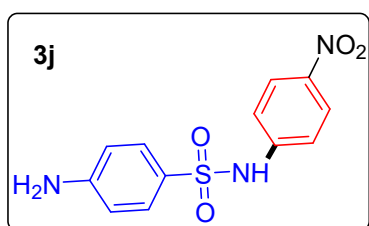

The compound **1a** (0.5 mmol, 94.0 mg), 4-nitrophenylboronic acid (**2j**, 0.75 mmol, 125.0 mg),  $\text{Na}_2\text{CO}_3$  (1.0 mmol, 106.0 mg),  $\text{Cu}^{2+}\text{BIM}$  (0.05 mmol, 17.0 mg) were dissolved in  $\text{H}_2\text{O}$  (5.0 mL) in a 25.0 mL boiling tube. The resulting reaction mixture was stirred for 24 h at rt, the reaction was extracted with ethyl acetate and the solvent was removed under vacuum. This compound is known and  $^1\text{H-NMR}$  data matches with reported spectra.<sup>5,6</sup> Yield 31%, White solid;  $^1\text{H NMR}$  (500 MHz,  $\text{DMSO-}d_6$ )  $\delta$  9.56 (s, 1H), 7.65–7.51 (m, 2H), 7.46 (d,  $J = 8.8$  Hz, 2H), 6.75–6.61 (m, 2H), 6.57 (d,  $J = 8.8$  Hz, 2H), 5.60 (s, 2H) ppm.

#### 4-amino-*N*-(naphthalen-1-yl)benzenesulfonamide (**3k**)

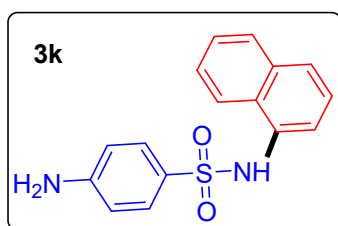

The compound **1a** (0.5 mmol, 94.0 mg), naphthalene-1-boronic acid (**2k**, 0.75 mmol, 130.0 mg),  $\text{Na}_2\text{CO}_3$  (1.0 mmol, 106.0 mg),  $\text{Cu}^{2+}\text{BIM}$  (0.05 mmol, 17.0 mg) were dissolved in  $\text{H}_2\text{O}$  (5.0 mL) in a 25.0 mL boiling tube. The resulting reaction mixture was stirred for 24 h at rt, the reaction was extracted with ethyl acetate and the solvent was removed under vacuum. This compound is known and  $^1\text{H-NMR}$  data matches with reported spectra.<sup>7,8</sup> Yield 34%, White solid;  $^1\text{H NMR}$  (500 MHz,  $\text{DMSO-}d_6$ )  $\delta$  9.72 (s, 1H), 7.81–7.76

(m, 2H), 7.71 (d,  $J = 8.8$  Hz, 2H), 7.54–7.30 (m, 2H), 7.15 (dd,  $J = 2.0, 8.0$  Hz, 2H), 6.92 (d,  $J = 5.0$  Hz, 1H), 6.80–6.67 (m, 2H), 5.61 (s, 2H) ppm.

#### 4-(phenylamino)benzenesulfonamide (**4a**)

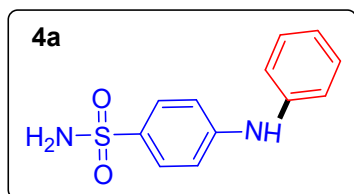

The compound **1a** (0.5 mmol, 94.0 mg), phenylboronic acid (**2a**, 0.75 mmol, 91.0 mg), 2,6-Lutidine (1.0 mmol, 107.5 mg),  $\text{Cu}^{2+}$ BIM (0.05 mmol, 17.0 mg) were dissolved in acetone (5.0 mL) in a 25.0 mL boiling tube. The resulting reaction mixture was stirred for 24 h at rt, and the solvent was removed under vacuum. This compound is known and  $^1\text{H-NMR}$  data matches with reported spectra.<sup>2</sup> Yield 65%, off-white solid;  $^1\text{H NMR}$  (500 MHz,  $\text{DMSO-}d_6$ )  $\delta$  8.69 (s, 1H), 7.68–7.59 (m, 2H), 7.39–7.29 (m, 2H), 7.18–7.10 (m, 2H), 7.08 (d,  $J = 8.8$  Hz, 2H), 7.07 (s, 2H), 6.95 (t,  $J = 7.8$  Hz, 1H) ppm.

#### 4-(*p*-tolylamino)benzenesulfonamide (**4b**)

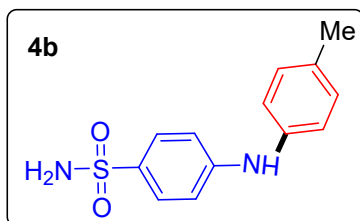

The compound **1a** (0.5 mmol, 94.0 mg), *p*-tolylboronic acid (**2b**, 0.75 mmol, 102.0 mg), 2,6-Lutidine (1.0 mmol, 107.5 mg),  $\text{Cu}^{2+}$ BIM (0.05 mmol, 17.0 mg) were dissolved in acetone (5.0 mL) in a 25.0 mL boiling tube. The resulting reaction mixture was stirred for 24 h at rt, and the solvent was removed under vacuum. This compound is known and  $^1\text{H-NMR}$  data matches with reported spectra.<sup>2</sup> Yield 62%, White solid;  $^1\text{H NMR}$  (500 MHz,  $\text{DMSO-}d_6$ )  $\delta$  8.58 (s, 1H), 7.67–7.56 (m, 2H), 7.13 (d,  $J = 8.4$  Hz, 2H), 7.10–6.92 (m, 6H), 2.30 (s, 1H) ppm.

#### 4-((4-(*tert*-butyl)phenyl)amino)benzenesulfonamide (**4c**)

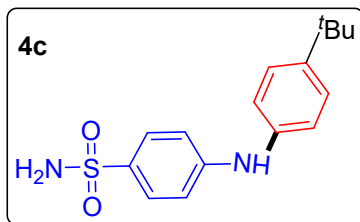

The compound **1a** (0.5 mmol, 94.0 mg), 4-*tert*-butylphenylboronic acid (**2c**, 0.75 mmol, 133.0 mg), 2,6-Lutidine (1.0 mmol, 107.5 mg), Cu<sup>2+</sup>BIM (0.05 mmol, 17.0 mg) were dissolved in acetone (5.0 mL) in a 25.0 mL boiling tube. The resulting reaction mixture was stirred for 24 h at rt, and the solvent was removed under vacuum. This compound is known and <sup>1</sup>H-NMR data matches with reported spectra.<sup>2</sup> Yield 51%, White solid; <sup>1</sup>H NMR (500 MHz, DMSO-*d*<sub>6</sub>) δ 8.60 (s, 1H), 7.59 (d, *J* = 8.8 Hz, 2H), 7.36 (d, *J* = 8.8 Hz, 2H), 7.09 (d, *J* = 8.8 Hz, 2H), 7.07–7.01 (m, 4H), 1.30 (s, 9H) ppm.

#### 4-((4-methoxyphenyl)amino)benzenesulfonamide (**4d**)

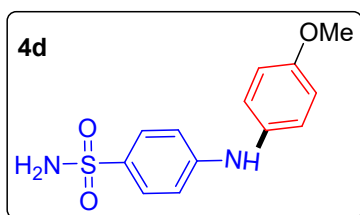

The compound **1a** (0.5 mmol, 94.0 mg), 4-methoxyphenylboronic acid (**2d**, 0.75 mmol, 114.0 mg), 2,6-Lutidine (1.0 mmol, 107.5 mg), Cu<sup>2+</sup>BIM (0.05 mmol, 17.0 mg) were dissolved in acetone (5.0 mL) in a 25.0 mL boiling tube. The resulting reaction mixture was stirred for 24 h at rt, and the solvent was removed under vacuum. This compound is known and <sup>1</sup>H-NMR data matches with reported spectra.<sup>9</sup> Yield 51%, White solid; <sup>1</sup>H NMR (500 MHz, DMSO-*d*<sub>6</sub>) δ 8.46 (s, 1H), 7.62–7.54 (m, 2H), 7.16 (dd, *J* = 2.0, 8.8 Hz, 2H), 6.98 (s, 2H), 6.95–6.88 (m, 4H), 3.74 (s, 3H) ppm.

#### 4-((4-fluorophenyl)amino)benzenesulfonamide (**4e**)

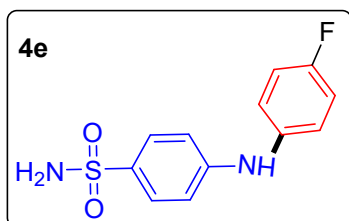

The compound **1a** (0.5 mmol, 94.0 mg), 4-fluorophenylboronic acid (**2e**, 0.75 mmol, 105.0 mg), 2,6-Lutidine (1.0 mmol, 107.5 mg), Cu<sup>2+</sup>BIM (0.05 mmol, 17.0 mg) were dissolved in acetone (5.0 mL) in a



25.0 mL boiling tube. The resulting reaction mixture was stirred for 24 h at rt, and the solvent was removed under vacuum. This compound is known and  $^1\text{H-NMR}$  data matches with reported spectra.<sup>2</sup> Yield 44%, Yellow solid;  $^1\text{H NMR}$  (500 MHz,  $\text{DMSO-}d_6$ )  $\delta$  8.62 (s, 1H), 7.59 (d,  $J = 8.8$  Hz, 2H), 7.25 (dd,  $J = 2.0, 8.8$  Hz, 2H), 7.18 (dd,  $J = 2.2, 8.8$  Hz, 2H), 7.08–6.94 (m, 4H) ppm.

#### 4-((4-chlorophenyl)amino)benzenesulfonamide (**4f**)

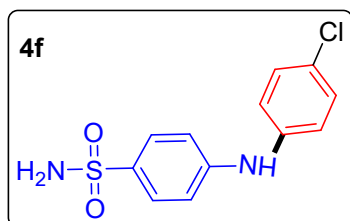

The compound **1a** (0.5 mmol, 94.0 mg), 4-chlorophenylboronic acid (**2f**, 0.75 mmol, 117.0 mg), 2,6-Lutidine (1.0 mmol, 107.5 mg),  $\text{Cu}^{2+}$ BIM (0.05 mmol, 17.0 mg) were dissolved in acetone (5.0 mL) in a 25.0 mL boiling tube. The resulting reaction mixture was stirred for 24 h at rt, and the solvent was removed under vacuum. This compound is known and  $^1\text{H-NMR}$  data matches with reported spectra.<sup>2</sup> Yield 51%, White solid;  $^1\text{H NMR}$  (500 MHz,  $\text{DMSO-}d_6$ )  $\delta$  8.79 (s, 1H), 7.68 (dd,  $J = 2.0, 8.8$  Hz, 2H), 7.36 (dd,  $J = 2.2, 8.8$  Hz, 2H), 7.18–7.12 (m, 2H), 7.11–6.81 (m, 4H) ppm.

#### Diphenylamine (CN1)

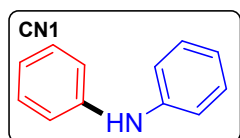

The compound **1a** (0.5 mmol, 46.0 mg), phenylboronic acid (**2a**, 0.75 mmol, 93.0 mg), 2,6-Lutidine (1.0 mmol, 107.5 mg),  $\text{Cu}^{2+}$ BIM (0.05 mmol, 17.0 mg) were dissolved in acetone (5.0 mL) in a 25.0 mL boiling tube. The resulting reaction mixture was stirred for 48 h at rt, and the solvent was removed under vacuum. This compound is known and  $^1\text{H-NMR}$  data matches with reported spectra.<sup>10</sup> Yield 84%, White solid;  $^1\text{H NMR}$  (500 MHz,  $\text{CDCl}_3$ )  $\delta$  7.30 (t,  $J = 8.0$  Hz, 4H), 7.18 (dd,  $J = 2.0, 8.0$  Hz, 4H), 6.97 (tt,  $J = 1.2, 7.2$  Hz, 2H), 5.69 (s, 1H) ppm.

#### 9-phenyl-9H-carbazole (CN2)

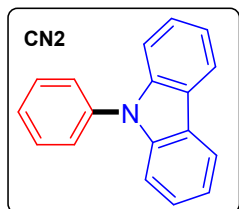

The compound **N2** (0.5 mmol, 83.0 mg), phenylboronic acid (**2a**, 0.75 mmol, 93.0 mg), 2,6-Lutidine (1.0 mmol, 107.5 mg), Cu<sup>2+</sup>BIM (0.05 mmol, 17.0 mg) were dissolved in acetone (5.0 mL) in a 25.0 mL boiling tube. The resulting reaction mixture was stirred for 24 h at rt, and the solvent was removed under vacuum. This compound is known and <sup>1</sup>H-NMR data matches with reported spectra.<sup>11</sup> Yield 56%, White solid; <sup>1</sup>H NMR (500 MHz, CDCl<sub>3</sub>) δ 8.10 (d, *J* = 7.8 Hz, 2H), 7.62–7.50 (m, 4H), 7.50–7.32 (m, 5H), 7.31–7.28 (m, 2H) ppm.

#### (2-(phenylamino)phenyl)methanol (CN3)

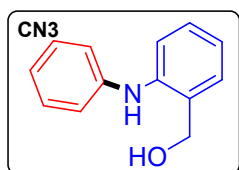

The compound **N3** (0.5 mmol, 61.0 mg), phenylboronic acid (**2a**, 0.75 mmol, 93.0 mg), 2,6-Lutidine (1.0 mmol, 107.5 mg), Cu<sup>2+</sup>BIM (0.05 mmol, 17.0 mg) were dissolved in acetone (5.0 mL) in a 25.0 mL boiling tube. The resulting reaction mixture was stirred for 36 h at rt, and the solvent was removed under vacuum. This compound is known and <sup>1</sup>H-NMR data matches with reported spectra.<sup>12</sup> Yield 41%, Yellowish oil; <sup>1</sup>H NMR (500 MHz, CDCl<sub>3</sub>) δ 7.41 (d, *J* = 7.8 Hz, 1H), 7.32–7.19 (m, 4H), 7.11 (dd, *J* = 1.2, 7.8 Hz, 2H), 7.04–6.85 (m, 2H), 4.73 (s, 4H) ppm.

#### *N*-phenylquinolin-8-amine (CN4)

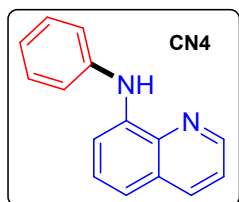

The compound **N4** (0.5 mmol, 72.0 mg), phenylboronic acid (**2a**, 0.75 mmol, 93.0 mg), 2,6-Lutidine (1.0 mmol, 107.5 mg), Cu<sup>2+</sup>BIM (0.05 mmol, 17.0 mg) were dissolved in acetone (5.0 mL) in a 25.0 mL boiling tube. The resulting reaction mixture was stirred for 48 h at rt, and the

solvent was removed under vacuum. This compound is known and  $^1\text{H-NMR}$  data matches with reported spectra.<sup>13</sup> Yield 20%, Pale-yellow solid;  $^1\text{H NMR}$  (500 MHz,  $\text{CDCl}_3$ )  $\delta$  8.78–8.75 (m, 1H), 8.25 (s, 1H), 8.15 (dd,  $J = 2.0, 8.4$  Hz, 1H), 7.50–7.42 (m, 1H), 7.40–7.33 (m, 6H), 7.23 (d,  $J = 2.2, 8.8$  Hz, 1H), 7.07–7.01 (m, 1H) ppm.

### 2-nitro-1-phenyl-1H-imidazole (CN5)

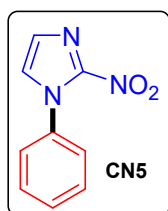

The compound **N5** (0.5 mmol, 56.0 mg), phenylboronic acid (**2a**, 0.75 mmol, 93.0 mg), 2,6-Lutidine (1.0 mmol, 107.5 mg),  $\text{Cu}^{2+}\text{BIM}$  (0.05 mmol, 17.0 mg) were dissolved in acetone (5.0 mL) in a 25.0 mL boiling tube. The resulting reaction mixture was stirred for 24 h at rt, and the solvent was removed under vacuum. This compound is known and  $^1\text{H-NMR}$  data matches with reported spectra.<sup>11</sup> Yield 67%, White solid;  $^1\text{H NMR}$  (500 MHz,  $\text{CDCl}_3$ )  $\delta$  7.58–7.45 (m, 3H), 7.38–7.29 (m, 2H), 7.27 (d,  $J = 10$  Hz, 1H), 7.19 (s, 1H) ppm.

### 1-phenyl-1H-benzo[d]imidazole (CN6)

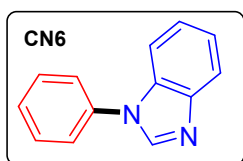

The compound **N6** (0.5 mmol, 59.0 mg), phenylboronic acid (**2a**, 0.75 mmol, 93.0 mg), 2,6-Lutidine (1.0 mmol, 107.5 mg),  $\text{Cu}^{2+}\text{BIM}$  (0.05 mmol, 17.0 mg) were dissolved in acetone (5.0 mL) in a 25.0 mL boiling tube. The resulting reaction mixture was stirred for 24 h at rt, and the solvent was removed under vacuum. This compound is known and  $^1\text{H-NMR}$  data matches with reported spectra.<sup>14</sup> Yield 45%, Pale-yellow solid;  $^1\text{H NMR}$  (500 MHz,  $\text{CDCl}_3$ )  $\delta$  8.17 (s, 1H), 7.91–7.86 (m, 1H), 7.56–7.41 (m, 6H), 7.32–7.29 (m, 2H) ppm.

### 2-phenylisoindoline-1,3-dione (CN7)

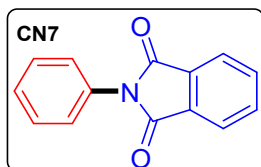

The compound **N7** (0.5 mmol, 73.0 mg), phenylboronic acid (**2a**, 0.75 mmol, 93.0 mg),  $\text{Na}_2\text{CO}_3$  (1.0 mmol, 106.0 mg),  $\text{Cu}^{2+}\text{BIM}$  (0.05 mmol, 17.0 mg) were dissolved in water (5.0 mL) in a 25.0 mL boiling tube. The resulting reaction mixture was stirred for 36 h at rt, and the solvent was removed under vacuum. This compound is known and  $^1\text{H-NMR}$  data matches with reported spectra.<sup>15</sup> Yield 27%, White solid;  $^1\text{H NMR}$  (500 MHz,  $\text{CDCl}_3$ )  $\delta$  7.95 (dt,  $J = 2.8, 7.0$  Hz, 2H), 7.78 (dd,  $J = 3.0, 5.5$  Hz, 2H), 7.50 (t,  $J = 7.7$  Hz, 2H), 7.45–7.37 (m, 3H) ppm.

#### 1,2-diphenyl-1*H*-benzo[*d*]imidazole (CN8)

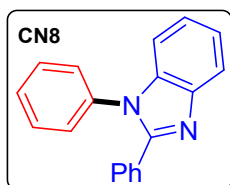

The compound **N8** (0.5 mmol, 97.0 mg), phenylboronic acid (**2a**, 0.75 mmol, 93.0 mg), 2,6-Lutidine (1.0 mmol, 107.5 mg),  $\text{Cu}^{2+}\text{BIM}$  (0.05 mmol, 17.0 mg) were dissolved in acetone (5.0 mL) in a 25.0 mL boiling tube. The resulting reaction mixture was stirred for 48 h at rt, and the solvent was removed under vacuum. This compound is known and  $^1\text{H-NMR}$  data matches with reported spectra.<sup>16</sup> Yield 32%, White solid;  $^1\text{H NMR}$  (500 MHz,  $\text{CDCl}_3$ )  $\delta$  7.89 (d,  $J = 8.0$  Hz, 1H), 7.59 (d,  $J = 7.2$  Hz, 2H), 7.53–7.45 (m, 3H), 7.39–7.24 (m, 8H) ppm.

#### 4-(phenylamino)phenol (CN9)

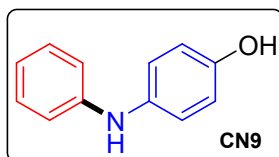

The compound **N9** (0.5 mmol, 54.0 mg), phenylboronic acid (**2a**, 0.75 mmol, 93.0 mg), 2,6-Lutidine (1.0 mmol, 107.5 mg),  $\text{Cu}^{2+}\text{BIM}$  (0.05 mmol, 17.0 mg) were dissolved in acetone (5.0 mL) in a 25.0 mL boiling tube. The resulting reaction mixture was stirred for 24 h at rt, and the solvent was removed under vacuum. This compound is known and  $^1\text{H-NMR}$  data matches with reported spectra.<sup>17</sup> Yield 30%, Off-white solid;  $^1\text{H NMR}$  (500 MHz,  $\text{CDCl}_3$ )  $\delta$  7.25–7.20 (m, 2H),

7.00 (d,  $J = 8.4$  Hz, 2H), 6.92 (d,  $J = 8.4$  Hz, 2H), 6.87 (t,  $J = 5.6, 7.4$  Hz, 2H), 6.80 (dd,  $J = 3.2, 6.8$  Hz, 2H), 5.52 (bs, 1H) ppm.

#### 4-phenoxyaniline (CN9')

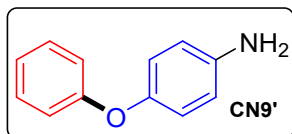

This compound is known and <sup>1</sup>H-NMR data matches with reported spectra.<sup>18</sup> Yield 10%, White solid; <sup>1</sup>H NMR (500 MHz, CDCl<sub>3</sub>)  $\delta$  7.26 (t,  $J = 8.0$  Hz, 2H), 6.99 (t,  $J = 8.0$  Hz, 1H), 6.90 (d,  $J = 6.2$  Hz, 2H), 6.84 (d,  $J = 8.0$  Hz, 2H), 6.65 (d,  $J = 8.0$  Hz, 2H), 3.58 (s, 2H) ppm.

#### N-phenylbenzamide (CN10)

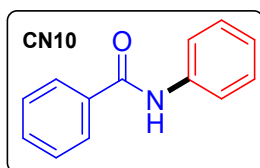

The compound **N10** (0.5 mmol, 60.0 mg), phenylboronic acid (**2a**, 0.75 mmol, 93.0 mg), 2,6-Lutidine (1.0 mmol, 107.5 mg), Cu<sup>2+</sup>BIM (0.05 mmol, 17.0 mg) were dissolved in acetone (5.0 mL) in a 25.0 mL boiling tube. The resulting reaction mixture was stirred for 48 h at rt, the reaction mixture extracted with ethyl acetate and the solvent was removed under vacuum. This compound is known and <sup>1</sup>H-NMR data matches with reported spectra.<sup>19</sup> Yield 56%, White solid; <sup>1</sup>H NMR (500 MHz, CDCl<sub>3</sub>)  $\delta$  7.89 (dd,  $J = 1.2, 8.4$  Hz, 3H), 7.68 (d,  $J = 7.6$  Hz, 2H), 7.58–7.52 (m, 1H), 7.50 (d,  $J = 7.8$  Hz, 2H), 7.41–7.30 (m, 2H), 7.15 (s, 1H) ppm.

#### 4-methyl-1,2-diphenyl-1H-imidazole (CN12)

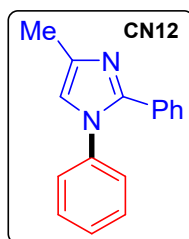

The compound **N12** (0.5 mmol, 79.0 mg), phenylboronic acid (**2a**, 0.75 mmol, 93.0 mg), 2,6-Lutidine (1.0 mmol, 107.5 mg), Cu<sup>2+</sup>BIM (0.05 mmol, 17.0 mg) were dissolved in acetone (5.0

mL) in a 25.0 mL boiling tube. The resulting reaction mixture was stirred for 36 h at rt, and the solvent was removed under vacuum. This compound is known and <sup>1</sup>H-NMR data matches with reported spectra.<sup>20</sup> Yield 41%, Yellow oil; <sup>1</sup>H NMR (500 MHz, CDCl<sub>3</sub>) δ 7.40–7.36 (m, 5H), 7.26–6.18 (m, 5H), 6.90 (s, 1H), 2.34 (s, 2H) ppm.

### ***N*-phenylnaphthalen-1-amine (CN13)**

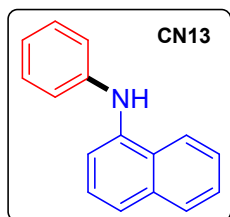

The compound **N13** (0.5 mmol, 71.0 mg), phenylboronic acid (**2a**, 0.75 mmol, 93.0 mg), 2,6-Lutidine (1.0 mmol, 107.5 mg), Cu<sup>2+</sup>BIM (0.025 mmol, 17.0 mg) were dissolved in acetone (5.0 mL) in a 25.0 mL boiling tube. The resulting reaction mixture was stirred for 24 h at rt, and the solvent was removed under vacuum. This compound is known and <sup>1</sup>H-NMR data matches with reported spectra.<sup>21</sup> Yield 33%, Yellowish sticky liquid; <sup>1</sup>H NMR (500 MHz, CDCl<sub>3</sub>) δ 8.12–8.04 (m, 1H), 7.95–7.90 (m, 1H), 7.65 (dd, *J* = 2.0, 6.8 Hz, 1H), 7.59–7.48 (m, 2H), 7.46–7.40 (m, 2H), 7.36–7.24 (m, 2H), 7.06 (dd, *J* = 1.2, 8.6 Hz, 2H), 7.00–6.95 (m, 1H), 5.92 (bs, 1H) ppm.

### **1,2-diphenyl-1*H*-imidazole (CN14)**

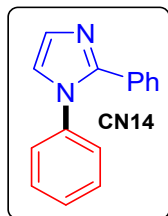

The compound **N14** (0.5 mmol, 72.0 mg), phenylboronic acid (**2a**, 0.75 mmol, 93.0 mg), 2,6-Lutidine (1.0 mmol, 107.5 mg), Cu<sup>2+</sup>BIM (0.05 mmol, 17.0 mg) were dissolved in acetone (5.0 mL) in a 25.0 mL boiling tube. The resulting reaction mixture was stirred for 24 h at rt, and the solvent was removed under vacuum. This compound is known and <sup>1</sup>H-NMR data matches with reported spectra.<sup>22</sup> Yield 40%, White solid; <sup>1</sup>H NMR (500 MHz, CDCl<sub>3</sub>) δ 7.44–7.36 (m, 5H), 7.25–7.15 (m, 5H), 7.14 (d, *J* = 3.2 Hz, 1H), 7.10 (d, *J* = 2.0 Hz, 1H) ppm.

### ***N*-benzylaniline (CN15)**

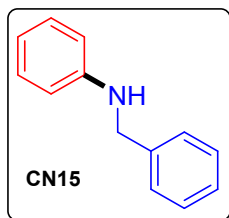

The compound **N15** (0.5 mmol, 54.0 mg), phenylboronic acid (**2a**, 0.75 mmol, 93.0 mg), 2,6-Lutidine (1.0 mmol, 107.5 mg), Cu<sup>2+</sup>BIM (0.05 mmol, 17.0 mg) were dissolved in acetone (5.0 mL) in a 25.0 mL boiling tube. The resulting reaction mixture was stirred for 24 h at rt, and the solvent was removed under vacuum. This compound is known and <sup>1</sup>H-NMR data matches with reported spectra.<sup>23</sup> Yield 43%, Colorless sticky liquid; <sup>1</sup>H NMR (500 MHz, CDCl<sub>3</sub>) δ 7.25–7.12 (m, 5H), 7.05 (t, *J* = 2.0, 8.0 Hz, 2H), 6.65 (t, *J* = 2.2, 7.8 Hz, 1H), 6.50 (d, *J* = 7.8 Hz, 2H), 4.20 (s, 2H), 3.85 (bs, 1H) ppm.





Figure S4. <sup>1</sup>H-NMR spectrum of compound BIMA1(CDCl<sub>3</sub>, 500 MHz)

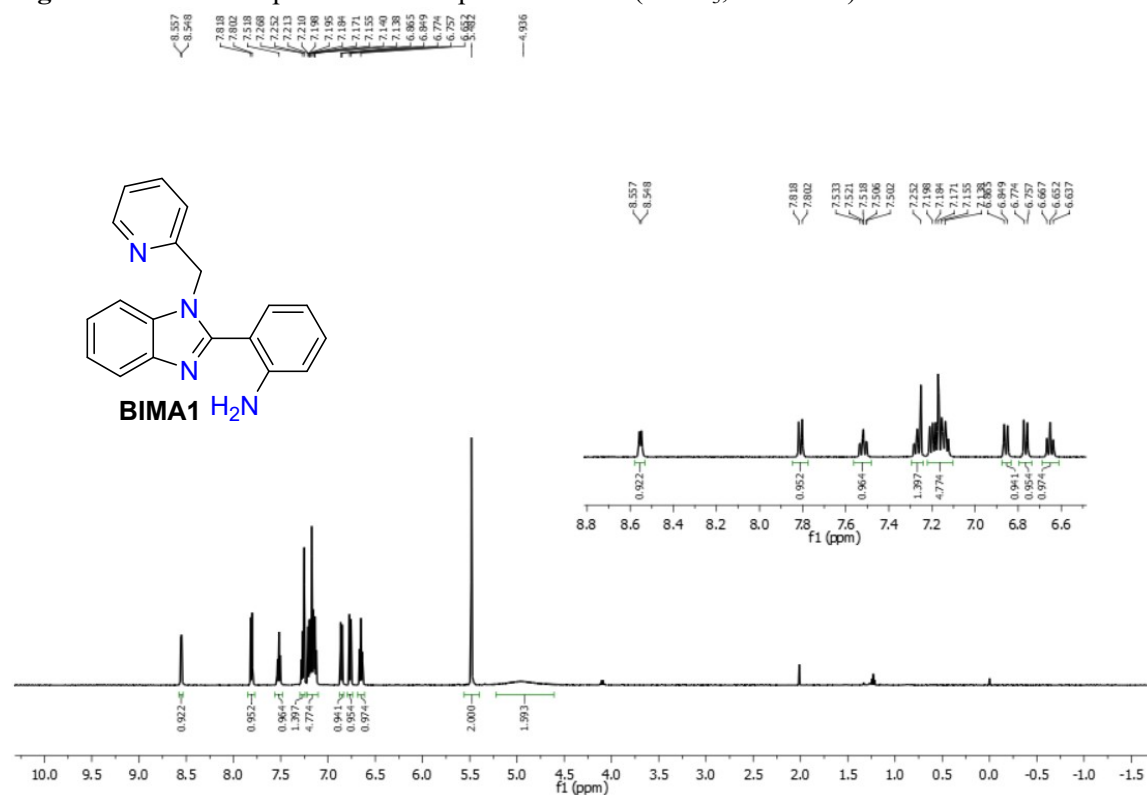

Figure S5. <sup>13</sup>C-NMR spectrum of compound BIMA1(CDCl<sub>3</sub>, 125 MHz)

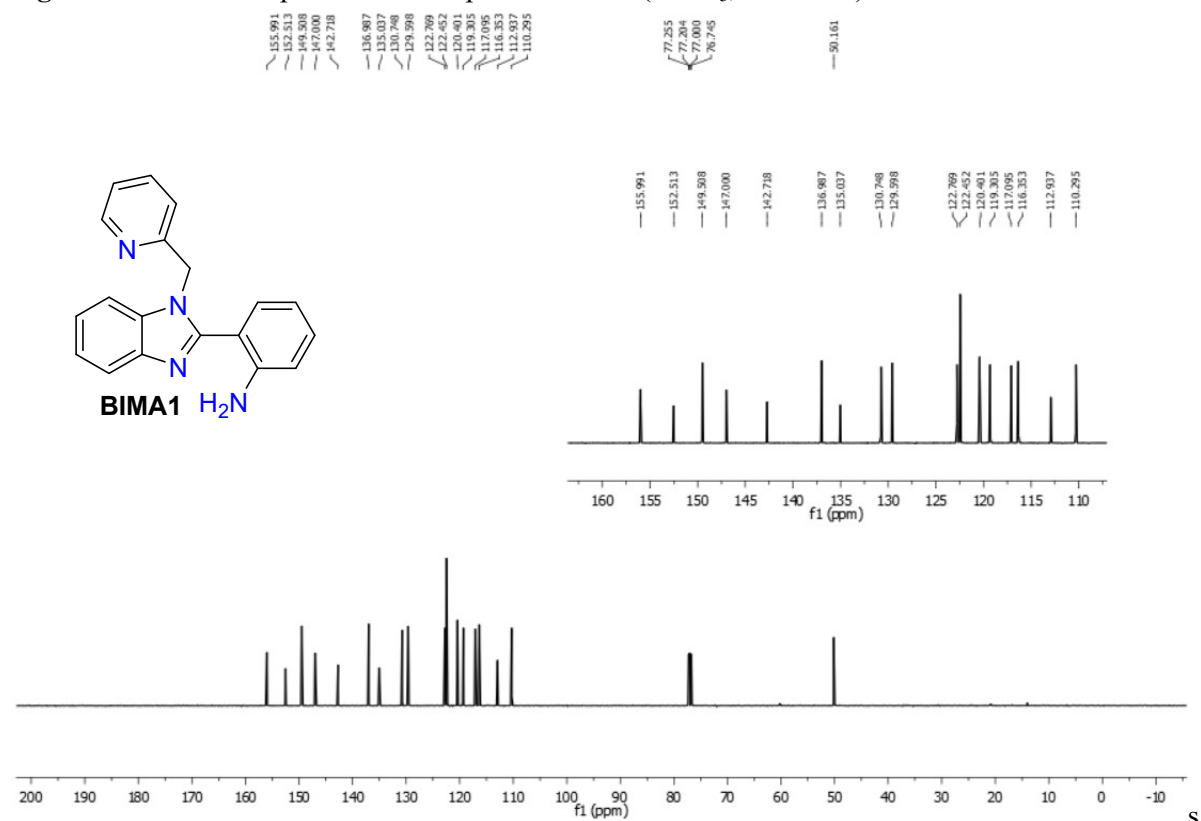

**Figure S6.** The solid-state structure of  $\text{Cu}^{2+}\text{BIM}$  [CCDC: 2236792]

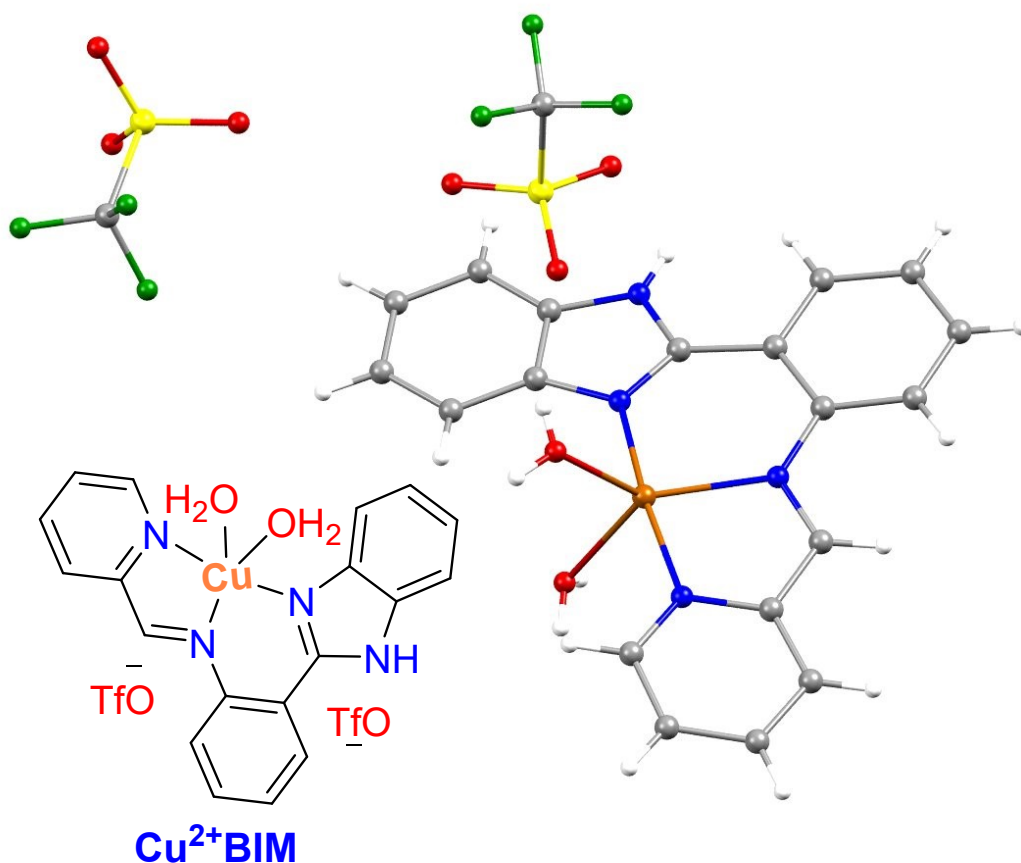

The integration of the data using a triclinic unit cell yielded a total of 41920 reflections to a maximum  $\theta$  angle of  $26.48^\circ$  ( $0.80 \text{ \AA}$  resolution), of which 5381 were independent (average redundancy 7.790, completeness = 99.4%,  $R_{\text{int}} = 2.66\%$ ,  $R_{\text{sig}} = 1.49\%$ ) and 5224 (97.08%) were greater than  $2\sigma$  ( $F^2$ ). The final cell constants of  $a = 7.8701(7) \text{ \AA}$ ,  $b = 11.5840(11) \text{ \AA}$ ,  $c = 14.7103(13) \text{ \AA}$ ,  $\alpha = 100.260(3)^\circ$ ,  $\beta = 90.700(3)^\circ$ ,  $\gamma = 97.224(3)^\circ$ , volume =  $1308.4(2) \text{ \AA}^3$ , are based upon the refinement of the XYZ-centroids of 842 reflections above  $20\sigma$  (I) with  $5.840^\circ < 2\theta < 68.29^\circ$ . The final anisotropic full-matrix least-squares refinement on  $F^2$  with 380 variables converged at  $R1 = 6.10\%$ , for the observed data and  $wR2 = 16.17\%$  for all data. The goodness-of-fit: GOF was 1.058. The largest peak in the final difference electron density synthesis was  $5.651 \text{ e}^-/\text{\AA}^3$  and the largest hole was  $-1.005 \text{ e}^-/\text{\AA}^3$  with an RMS deviation of  $0.148 \text{ e}^-/\text{\AA}^3$ . Based on the final model, the calculated density was  $1.767 \text{ g/cm}^3$  and  $F(000)$ , 702  $e^-$ .

**Table S2.** Sample and crystal data for Cu<sup>2+</sup>BIM

---

|                               |                                                                                               |                 |
|-------------------------------|-----------------------------------------------------------------------------------------------|-----------------|
| <b>Identification code</b>    | Mo_D_JE_011_100K                                                                              |                 |
| <b>Chemical formula</b>       | C <sub>21</sub> H <sub>18</sub> CuF <sub>6</sub> N <sub>4</sub> O <sub>8</sub> S <sub>2</sub> |                 |
| <b>Formula weight</b>         | 696.05 g/mol                                                                                  |                 |
| <b>Temperature</b>            | 100(2) K                                                                                      |                 |
| <b>Wavelength</b>             | 0.71073 Å                                                                                     |                 |
| <b>Crystal size</b>           | (0.245 x 0.493 x 0.588) mm <sup>3</sup>                                                       |                 |
| <b>Crystal system</b>         | triclinic                                                                                     |                 |
| <b>Space group</b>            | P -1                                                                                          |                 |
| <b>Unit cell dimensions</b>   | a = 7.8701(7) Å                                                                               | α = 100.260(3)° |
|                               | b = 11.5840(11) Å                                                                             | β = 90.700(3)°  |
|                               | c = 14.7103(13) Å                                                                             | γ = 97.224(3)°  |
| <b>Volume</b>                 | 1308.4(2) Å <sup>3</sup>                                                                      |                 |
| <b>Z</b>                      | 2                                                                                             |                 |
| <b>Density (calculated)</b>   | 1.767 g/cm <sup>3</sup>                                                                       |                 |
| <b>Absorption coefficient</b> | 1.092 mm <sup>-1</sup>                                                                        |                 |
| <b>F(000)</b>                 | 702                                                                                           |                 |

**Table S3.** Data collection and structure refinement for Cu<sup>2+</sup>BIM

|                                            |                                                                              |
|--------------------------------------------|------------------------------------------------------------------------------|
| <b>Theta range for data collection</b>     | 2.08 to 26.48°                                                               |
| <b>Index ranges</b>                        | -9<=h<=9, -14<=k<=14, -18<=l<=18                                             |
| <b>Reflections collected</b>               | 41920                                                                        |
| <b>Independent reflections</b>             | 5381 [R(int) = 0.0266]                                                       |
| <b>Coverage of independent reflections</b> | 99.4%                                                                        |
| <b>Absorption correction</b>               | Multi-Scan                                                                   |
| <b>Max. and min. transmission</b>          | 0.7760 and 0.5660                                                            |
| <b>Structure solution technique</b>        | direct methods                                                               |
| <b>Structure solution program</b>          | XT, VERSION 2014/5                                                           |
| <b>Refinement method</b>                   | Full-matrix least-squares on F <sup>2</sup>                                  |
| <b>Refinement program</b>                  | SHELXL-2018/3 (Sheldrick, 2018)                                              |
| <b>Function minimized</b>                  | Σ w(F <sub>o</sub> <sup>2</sup> - F <sub>c</sub> <sup>2</sup> ) <sup>2</sup> |

|                                         |                                                                                                                                                               |
|-----------------------------------------|---------------------------------------------------------------------------------------------------------------------------------------------------------------|
| <b>Data / restraints / parameters</b>   | 5381 / 0 / 380                                                                                                                                                |
| <b>Goodness-of-fit on F<sup>2</sup></b> | 1.058                                                                                                                                                         |
| <b>Final R indices</b>                  | 5224 data; R1 = 0.0610, wR2 = 0.1576<br>I > 2σ(I)                                                                                                             |
|                                         | all data R1 = 0.0627, wR2 = 0.1617                                                                                                                            |
| <b>Weighting scheme</b>                 | w=1/[σ <sup>2</sup> (F <sub>o</sub> <sup>2</sup> )+(0.0814P) <sup>2</sup> +7.5894P]<br>where P=(F <sub>o</sub> <sup>2</sup> +2F <sub>c</sub> <sup>2</sup> )/3 |
| <b>Extinction coefficient</b>           | 0.0350(30)                                                                                                                                                    |
| <b>Largest diff. peak and hole</b>      | 5.651 and -1.005 eÅ <sup>-3</sup>                                                                                                                             |
| <b>R.M.S. deviation from mean</b>       | 0.148 eÅ <sup>-3</sup>                                                                                                                                        |

**Table S4.** Atomic coordinates and equivalent isotropic atomic displacement parameters (Å<sup>2</sup>) for Cu<sup>2+</sup>BIM

---

*U(eq) is defined as one third of the trace of the orthogonalized U<sub>ij</sub> tensor.*

|     | <b>x/a</b> | <b>y/b</b> | <b>z/c</b>  | <b>U(eq)</b> |
|-----|------------|------------|-------------|--------------|
| Cu1 | 0.68774(6) | 0.43633(4) | 0.73136(3)  | 0.01440(19)  |
| N1  | 0.8398(4)  | 0.5691(3)  | 0.8065(2)   | 0.0152(7)    |
| N2  | 0.8669(4)  | 0.3411(3)  | 0.7730(2)   | 0.0118(6)    |
| N3  | 0.5459(4)  | 0.2950(3)  | 0.6685(2)   | 0.0140(6)    |
| N4  | 0.4471(4)  | 0.1082(3)  | 0.6194(2)   | 0.0146(6)    |
| O1  | 0.6889(4)  | 0.5214(2)  | 0.61881(19) | 0.0198(6)    |
| O2  | 0.4713(4)  | 0.4919(2)  | 0.80329(18) | 0.0156(6)    |
| C1  | 0.8248(5)  | 0.6833(4)  | 0.8188(3)   | 0.0180(8)    |
| C2  | 0.9312(5)  | 0.7667(4)  | 0.8818(3)   | 0.0198(8)    |
| C3  | 0.0559(5)  | 0.7296(4)  | 0.9327(3)   | 0.0195(8)    |
| C4  | 0.0729(5)  | 0.6097(4)  | 0.9193(3)   | 0.0181(8)    |
| C5  | 0.9637(5)  | 0.5319(3)  | 0.8556(3)   | 0.0145(7)    |
| C6  | 0.9720(5)  | 0.4051(3)  | 0.8351(3)   | 0.0155(8)    |
| C7  | 0.8705(5)  | 0.2169(3)  | 0.7489(3)   | 0.0117(7)    |

|     | <b>x/a</b>  | <b>y/b</b> | <b>z/c</b>  | <b>U(eq)</b> |
|-----|-------------|------------|-------------|--------------|
| C8  | 0.0101(5)   | 0.1650(4)  | 0.7755(3)   | 0.0184(8)    |
| C9  | 0.0158(5)   | 0.0451(4)  | 0.7529(3)   | 0.0210(8)    |
| C10 | 0.8811(5)   | 0.9723(4)  | 0.7013(3)   | 0.0207(8)    |
| C11 | 0.7439(5)   | 0.0223(3)  | 0.6726(3)   | 0.0162(8)    |
| C12 | 0.7340(5)   | 0.1436(3)  | 0.6956(2)   | 0.0114(7)    |
| C13 | 0.5805(5)   | 0.1864(3)  | 0.6627(2)   | 0.0112(7)    |
| C14 | 0.3223(5)   | 0.1727(3)  | 0.5956(3)   | 0.0142(7)    |
| C15 | 0.1630(5)   | 0.1353(4)  | 0.5496(3)   | 0.0160(8)    |
| C16 | 0.0655(5)   | 0.2221(4)  | 0.5363(3)   | 0.0176(8)    |
| C17 | 0.1257(5)   | 0.3427(4)  | 0.5675(3)   | 0.0190(8)    |
| C18 | 0.2841(5)   | 0.3789(3)  | 0.6131(3)   | 0.0176(8)    |
| C19 | 0.3821(5)   | 0.2915(4)  | 0.6268(3)   | 0.0140(7)    |
| C20 | 0.5643(5)   | 0.8625(4)  | 0.0793(3)   | 0.0163(8)    |
| O11 | 0.3671(4)   | 0.6672(3)  | 0.0774(2)   | 0.0201(6)    |
| O12 | 0.6742(4)   | 0.6608(3)  | 0.0749(2)   | 0.0243(7)    |
| O13 | 0.5198(4)   | 0.6947(3)  | 0.9379(2)   | 0.0232(7)    |
| S1  | 0.52735(12) | 0.70343(8) | 0.03733(6)  | 0.0144(2)    |
| F11 | 0.7055(3)   | 0.9132(2)  | 0.04563(18) | 0.0265(6)    |
| F12 | 0.5837(3)   | 0.8857(2)  | 0.17166(16) | 0.0234(5)    |
| F13 | 0.4321(4)   | 0.9141(2)  | 0.0565(2)   | 0.0290(6)    |
| C21 | 0.7211(6)   | 0.2420(4)  | 0.2967(3)   | 0.0194(8)    |
| O21 | 0.4323(4)   | 0.2630(3)  | 0.3737(2)   | 0.0216(6)    |
| O22 | 0.6946(4)   | 0.3571(2)  | 0.46017(19) | 0.0186(6)    |
| O23 | 0.6242(4)   | 0.1428(2)  | 0.43387(19) | 0.0158(6)    |
| S2  | 0.60477(11) | 0.25259(8) | 0.40319(6)  | 0.0115(2)    |
| F21 | 0.6589(5)   | 0.1461(3)  | 0.23587(19) | 0.0377(7)    |
| F22 | 0.8865(4)   | 0.2346(3)  | 0.3137(2)   | 0.0341(7)    |
| F23 | 0.7135(4)   | 0.3360(2)  | 0.25786(18) | 0.0316(7)    |

**Table S5.** Bond lengths (Å) for Cu<sup>2+</sup>BIM

---

|         |          |         |          |
|---------|----------|---------|----------|
| Cu1-N3  | 1.938(3) | Cu1-N1  | 1.980(3) |
| Cu1-N2  | 2.047(3) | Cu1-O1  | 2.072(3) |
| Cu1-O2  | 2.124(3) | N1-C1   | 1.323(5) |
| N1-C5   | 1.363(5) | N2-C6   | 1.286(5) |
| N2-C7   | 1.423(5) | N3-C13  | 1.309(5) |
| N3-C19  | 1.414(5) | N4-C13  | 1.366(5) |
| N4-C14  | 1.384(5) | N4-H4   | 0.880000 |
| O1-H11W | 0.689(3) | O1-H12W | 0.794(3) |
| O2-H22W | 0.732(3) | O2-H21W | 0.638(3) |
| C1-C2   | 1.397(6) | C1-H1   | 0.950000 |
| C2-C3   | 1.382(6) | C2-H2   | 0.950000 |
| C3-C4   | 1.391(6) | C3-H3   | 0.950000 |
| C4-C5   | 1.384(6) | C4-H4A  | 0.950000 |
| C5-C6   | 1.456(5) | C6-H6   | 0.950000 |
| C7-C8   | 1.400(5) | C7-C12  | 1.416(5) |
| C8-C9   | 1.376(6) | C8-H8   | 0.950000 |
| C9-C10  | 1.392(6) | C9-H9   | 0.950000 |
| C10-C11 | 1.383(6) | C10-H10 | 0.950000 |
| C11-C12 | 1.398(5) | C11-H11 | 0.950000 |
| C12-C13 | 1.470(5) | C14-C19 | 1.390(5) |
| C14-C15 | 1.398(5) | C15-C16 | 1.377(6) |
| C15-H15 | 0.950000 | C16-C17 | 1.410(6) |
| C16-H16 | 0.950000 | C17-C18 | 1.388(6) |
| C17-H17 | 0.950000 | C18-C19 | 1.388(6) |

|         |          |         |          |
|---------|----------|---------|----------|
| C18-H18 | 0.950000 | C20-F13 | 1.331(5) |
| C20-F11 | 1.333(5) | C20-F12 | 1.341(5) |
| C20-S1  | 1.821(4) | O11-S1  | 1.445(3) |
| O12-S1  | 1.453(3) | O13-S1  | 1.448(3) |
| C21-F23 | 1.323(5) | C21-F21 | 1.332(5) |
| C21-F22 | 1.339(5) | C21-S2  | 1.817(4) |
| O21-S2  | 1.447(3) | O22-S2  | 1.441(3) |
| O23-S2  | 1.448(3) |         |          |

**Table S6.** Bond angles (°) for Cu<sup>2+</sup>BIM

---

|              |            |              |            |
|--------------|------------|--------------|------------|
| N3-Cu1-N1    | 173.12(14) | N3-Cu1-N2    | 92.57(13)  |
| N1-Cu1-N2    | 81.73(14)  | N3-Cu1-O1    | 94.21(13)  |
| N1-Cu1-O1    | 92.38(13)  | N2-Cu1-O1    | 128.98(13) |
| N3-Cu1-O2    | 89.75(13)  | N1-Cu1-O2    | 90.75(12)  |
| N2-Cu1-O2    | 128.06(12) | O1-Cu1-O2    | 102.50(11) |
| C1-N1-C5     | 119.2(3)   | C1-N1-Cu1    | 127.8(3)   |
| C5-N1-Cu1    | 112.7(3)   | C6-N2-C7     | 120.7(3)   |
| C6-N2-Cu1    | 111.6(3)   | C7-N2-Cu1    | 127.2(2)   |
| C13-N3-C19   | 108.5(3)   | C13-N3-Cu1   | 125.8(3)   |
| C19-N3-Cu1   | 125.5(3)   | C13-N4-C14   | 107.9(3)   |
| C13-N4-H4    | 126.000000 | C14-N4-H4    | 126.000000 |
| Cu1-O1-H11W  | 117.0(3)   | Cu1-O1-H12W  | 129.3(3)   |
| H11W-O1-H12W | 107.3(4)   | Cu1-O2-H22W  | 115.1(3)   |
| Cu1-O2-H21W  | 105.1(3)   | H22W-O2-H21W | 115.6(4)   |
| N1-C1-C2     | 121.8(4)   | N1-C1-H1     | 119.100000 |
| C2-C1-H1     | 119.100000 | C3-C2-C1     | 119.4(4)   |
| C3-C2-H2     | 120.300000 | C1-C2-H2     | 120.300000 |

|             |            |             |            |
|-------------|------------|-------------|------------|
| C2-C3-C4    | 119.0(4)   | C2-C3-H3    | 120.500000 |
| C4-C3-H3    | 120.500000 | C5-C4-C3    | 118.6(4)   |
| C5-C4-H4A   | 120.700000 | C3-C4-H4A   | 120.700000 |
| N1-C5-C4    | 122.0(4)   | N1-C5-C6    | 114.8(3)   |
| C4-C5-C6    | 123.2(4)   | N2-C6-C5    | 118.1(4)   |
| N2-C6-H6    | 120.900000 | C5-C6-H6    | 120.900000 |
| C8-C7-C12   | 118.6(3)   | C8-C7-N2    | 121.0(3)   |
| C12-C7-N2   | 120.4(3)   | C9-C8-C7    | 121.8(4)   |
| C9-C8-H8    | 119.100000 | C7-C8-H8    | 119.100000 |
| C8-C9-C10   | 119.9(4)   | C8-C9-H9    | 120.100000 |
| C10-C9-H9   | 120.100000 | C11-C10-C9  | 119.2(4)   |
| C11-C10-H10 | 120.400000 | C9-C10-H10  | 120.400000 |
| C10-C11-C12 | 122.1(4)   | C10-C11-H11 | 119.000000 |
| C12-C11-H11 | 119.000000 | C11-C12-C7  | 118.4(3)   |
| C11-C12-C13 | 117.3(3)   | C7-C12-C13  | 124.3(3)   |
| N3-C13-N4   | 110.2(3)   | N3-C13-C12  | 129.4(3)   |
| N4-C13-C12  | 120.4(3)   | N4-C14-C19  | 107.0(3)   |
| N4-C14-C15  | 130.6(4)   | C19-C14-C15 | 122.4(4)   |
| C16-C15-C14 | 116.9(4)   | C16-C15-H15 | 121.500000 |
| C14-C15-H15 | 121.500000 | C15-C16-C17 | 120.9(4)   |
| C15-C16-H16 | 119.500000 | C17-C16-H16 | 119.500000 |
| C18-C17-C16 | 121.7(4)   | C18-C17-H17 | 119.200000 |
| C16-C17-H17 | 119.200000 | C17-C18-C19 | 117.4(4)   |
| C17-C18-H18 | 121.300000 | C19-C18-H18 | 121.300000 |
| C18-C19-C14 | 120.6(3)   | C18-C19-N3  | 133.0(4)   |
| C14-C19-N3  | 106.4(3)   | F13-C20-F11 | 108.4(3)   |
| F13-C20-F12 | 107.6(3)   | F11-C20-F12 | 107.2(3)   |
| F13-C20-S1  | 110.9(3)   | F11-C20-S1  | 112.1(3)   |
| F12-C20-S1  | 110.4(3)   | O11-S1-O13  | 115.02(18) |



|             |            |             |            |
|-------------|------------|-------------|------------|
| O11-S1-O12  | 113.85(19) | O13-S1-O12  | 115.7(2)   |
| O11-S1-C20  | 103.37(18) | O13-S1-C20  | 102.97(18) |
| O12-S1-C20  | 103.58(18) | F23-C21-F21 | 108.3(3)   |
| F23-C21-F22 | 107.8(4)   | F21-C21-F22 | 107.5(3)   |
| F23-C21-S2  | 111.4(3)   | F21-C21-S2  | 111.4(3)   |
| F22-C21-S2  | 110.3(3)   | O22-S2-O21  | 115.23(18) |
| O22-S2-O23  | 114.84(17) | O21-S2-O23  | 114.75(17) |
| O22-S2-C21  | 102.83(19) | O21-S2-C21  | 103.4(2)   |
| O23-S2-C21  | 103.41(17) |             |            |

**Table S7.** Torsion angles ( $^{\circ}$ ) for Cu<sup>2+</sup>BIM

|                |           |                 |           |
|----------------|-----------|-----------------|-----------|
| C5-N1-C1-C2    | -0.9(6)   | Cu1-N1-C1-C2    | 173.0(3)  |
| N1-C1-C2-C3    | 0.1(6)    | C1-C2-C3-C4     | 0.4(6)    |
| C2-C3-C4-C5    | -0.2(6)   | C1-N1-C5-C4     | 1.2(6)    |
| Cu1-N1-C5-C4   | -173.6(3) | C1-N1-C5-C6     | -178.5(3) |
| Cu1-N1-C5-C6   | 6.7(4)    | C3-C4-C5-N1     | -0.6(6)   |
| C3-C4-C5-C6    | 179.0(4)  | C7-N2-C6-C5     | 179.0(3)  |
| Cu1-N2-C6-C5   | -8.3(4)   | N1-C5-C6-N2     | 1.3(5)    |
| C4-C5-C6-N2    | -178.4(4) | C6-N2-C7-C8     | -14.7(5)  |
| Cu1-N2-C7-C8   | 173.8(3)  | C6-N2-C7-C12    | 166.8(3)  |
| Cu1-N2-C7-C12  | -4.8(5)   | C12-C7-C8-C9    | -1.5(6)   |
| N2-C7-C8-C9    | 179.9(4)  | C7-C8-C9-C10    | 0.9(7)    |
| C8-C9-C10-C11  | 0.7(7)    | C9-C10-C11-C12  | -1.5(6)   |
| C10-C11-C12-C7 | 0.9(6)    | C10-C11-C12-C13 | -178.8(4) |
| C8-C7-C12-C11  | 0.7(5)    | N2-C7-C12-C11   | 179.2(3)  |
| C8-C7-C12-C13  | -179.7(4) | N2-C7-C12-C13   | -1.1(5)   |
| C19-N3-C13-N4  | -0.4(4)   | Cu1-N3-C13-N4   | 175.5(2)  |

|                 |           |                 |           |
|-----------------|-----------|-----------------|-----------|
| C19-N3-C13-C12  | 180.0(3)  | Cu1-N3-C13-C12  | -4.2(6)   |
| C14-N4-C13-N3   | 0.9(4)    | C14-N4-C13-C12  | -179.4(3) |
| C11-C12-C13-N3  | -174.2(4) | C7-C12-C13-N3   | 6.1(6)    |
| C11-C12-C13-N4  | 6.1(5)    | C7-C12-C13-N4   | -173.5(3) |
| C13-N4-C14-C19  | -1.0(4)   | C13-N4-C14-C15  | 179.3(4)  |
| N4-C14-C15-C16  | 179.6(4)  | C19-C14-C15-C16 | 0.0(6)    |
| C14-C15-C16-C17 | 0.3(6)    | C15-C16-C17-C18 | -0.4(6)   |
| C16-C17-C18-C19 | 0.2(6)    | C17-C18-C19-C14 | 0.1(6)    |
| C17-C18-C19-N3  | 179.2(4)  | N4-C14-C19-C18  | -179.9(3) |
| C15-C14-C19-C18 | -0.2(6)   | N4-C14-C19-N3   | 0.8(4)    |
| C15-C14-C19-N3  | -179.5(3) | C13-N3-C19-C18  | -179.5(4) |
| Cu1-N3-C19-C18  | 4.6(6)    | C13-N3-C19-C14  | -0.3(4)   |
| Cu1-N3-C19-C14  | -176.2(3) | F13-C20-S1-O11  | -56.0(3)  |
| F11-C20-S1-O11  | -177.3(3) | F12-C20-S1-O11  | 63.2(3)   |
| F13-C20-S1-O13  | 64.1(3)   | F11-C20-S1-O13  | -57.3(3)  |
| F12-C20-S1-O13  | -176.7(3) | F13-C20-S1-O12  | -175.0(3) |
| F11-C20-S1-O12  | 63.7(3)   | F12-C20-S1-O12  | -55.8(3)  |
| F23-C21-S2-O22  | -61.4(4)  | F21-C21-S2-O22  | 177.6(3)  |
| F22-C21-S2-O22  | 58.3(3)   | F23-C21-S2-O21  | 58.8(4)   |
| F21-C21-S2-O21  | -62.2(3)  | F22-C21-S2-O21  | 178.5(3)  |
| F23-C21-S2-O23  | 178.8(3)  | F21-C21-S2-O23  | 57.8(3)   |
| F22-C21-S2-O23  | -61.5(3)  |                 |           |

**Table S8.** Anisotropic atomic displacement parameters ( $\text{\AA}^2$ ) for  $\text{Cu}^{2+}$ BIM

---

*The anisotropic atomic displacement factor exponent takes the*

*form:  $-2\pi^2 [ h^2 a^{*2} U_{11} + \dots + 2 h k a^* b^* U_{12} ]$*

|     | $U_{11}$   | $U_{22}$   | $U_{33}$   | $U_{23}$    | $U_{13}$     | $U_{12}$     |
|-----|------------|------------|------------|-------------|--------------|--------------|
| Cu1 | 0.0131(3)  | 0.0107(3)  | 0.0180(3)  | 0.00047(18) | -0.00472(18) | -0.00029(17) |
| N1  | 0.0126(15) | 0.0181(16) | 0.0132(15) | 0.0013(12)  | -0.0004(12)  | -0.0024(12)  |
| N2  | 0.0105(14) | 0.0127(15) | 0.0127(15) | 0.0028(12)  | 0.0011(11)   | 0.0025(11)   |
| N3  | 0.0141(15) | 0.0109(15) | 0.0162(15) | 0.0009(12)  | -0.0038(12)  | 0.0012(12)   |
| N4  | 0.0135(15) | 0.0158(16) | 0.0149(15) | 0.0041(12)  | -0.0011(12)  | 0.0018(12)   |
| O1  | 0.0379(17) | 0.0107(13) | 0.0114(13) | 0.0019(10)  | 0.0014(12)   | 0.0049(12)   |
| O2  | 0.0195(14) | 0.0140(13) | 0.0130(13) | -0.0002(10) | 0.0006(10)   | 0.0045(11)   |
| C1  | 0.0156(18) | 0.0189(19) | 0.0201(19) | 0.0048(15)  | 0.0021(15)   | 0.0020(15)   |
| C2  | 0.022(2)   | 0.0143(18) | 0.022(2)   | 0.0003(15)  | 0.0061(16)   | 0.0015(15)   |
| C3  | 0.0177(19) | 0.0181(19) | 0.0177(19) | -0.0050(15) | 0.0026(15)   | -0.0049(15)  |
| C4  | 0.0145(18) | 0.021(2)   | 0.0164(18) | -0.0016(15) | -0.0006(15)  | 0.0010(15)   |
| C5  | 0.0148(18) | 0.0150(18) | 0.0122(17) | 0.0005(14)  | 0.0036(14)   | -0.0004(14)  |
| C6  | 0.0166(18) | 0.0166(19) | 0.0134(18) | 0.0020(14)  | 0.0042(14)   | 0.0035(15)   |
| C7  | 0.0102(16) | 0.0117(17) | 0.0132(17) | 0.0023(13)  | 0.0011(13)   | 0.0016(13)   |
| C8  | 0.0133(18) | 0.0165(19) | 0.024(2)   | 0.0003(15)  | -0.0050(15)  | 0.0031(15)   |
| C9  | 0.0156(19) | 0.020(2)   | 0.028(2)   | 0.0044(17)  | -0.0058(16)  | 0.0074(16)   |
| C10 | 0.020(2)   | 0.0126(18) | 0.030(2)   | 0.0021(16)  | -0.0011(17)  | 0.0050(15)   |
| C11 | 0.0129(18) | 0.0133(18) | 0.0214(19) | 0.0009(15)  | -0.0028(15)  | 0.0016(14)   |
| C12 | 0.0086(16) | 0.0131(17) | 0.0126(16) | 0.0029(13)  | -0.0001(13)  | 0.0011(13)   |
| C13 | 0.0100(16) | 0.0150(17) | 0.0100(16) | 0.0044(13)  | 0.0025(13)   | 0.0040(13)   |
| C14 | 0.0118(17) | 0.0193(19) | 0.0121(17) | 0.0050(14)  | -0.0003(14)  | 0.0016(14)   |
| C15 | 0.0141(18) | 0.0169(18) | 0.0157(18) | 0.0023(14)  | -0.0028(14)  | -0.0020(15)  |
| C16 | 0.0123(18) | 0.023(2)   | 0.0171(18) | 0.0041(15)  | -0.0064(14)  | 0.0004(15)   |
| C17 | 0.021(2)   | 0.019(2)   | 0.0184(19) | 0.0049(16)  | -0.0014(16)  | 0.0073(16)   |
| C18 | 0.022(2)   | 0.0129(18) | 0.0165(18) | 0.0008(14)  | -0.0005(15)  | -0.0022(15)  |
| C19 | 0.0081(16) | 0.0206(19) | 0.0108(16) | 0.0000(14)  | -0.0031(13)  | -0.0038(14)  |
| C20 | 0.0154(18) | 0.0190(19) | 0.0145(18) | 0.0030(14)  | 0.0007(14)   | 0.0019(15)   |
| O11 | 0.0180(14) | 0.0240(15) | 0.0173(14) | 0.0053(11)  | 0.0000(11)   | -0.0027(11)  |
| O12 | 0.0173(15) | 0.0213(15) | 0.0341(17) | 0.0022(13)  | -0.0063(13)  | 0.0059(12)   |
| O13 | 0.0270(16) | 0.0266(16) | 0.0123(14) | -0.0029(11) | 0.0013(12)   | -0.0016(13)  |
| S1  | 0.0143(5)  | 0.0154(5)  | 0.0124(4)  | -0.0001(3)  | -0.0016(3)   | 0.0013(3)    |
| F11 | 0.0258(13) | 0.0248(13) | 0.0271(13) | 0.0058(11)  | 0.0066(11)   | -0.0058(10)  |

|     | $U_{11}$   | $U_{22}$   | $U_{33}$   | $U_{23}$    | $U_{13}$    | $U_{12}$    |
|-----|------------|------------|------------|-------------|-------------|-------------|
| F12 | 0.0275(13) | 0.0254(13) | 0.0134(11) | -0.0034(9)  | 0.0007(10)  | -0.0014(10) |
| F13 | 0.0275(14) | 0.0226(13) | 0.0388(16) | 0.0061(11)  | -0.0057(12) | 0.0105(11)  |
| C21 | 0.029(2)   | 0.0170(19) | 0.0149(18) | 0.0038(15)  | 0.0055(16)  | 0.0137(16)  |
| O21 | 0.0147(14) | 0.0159(14) | 0.0349(17) | 0.0040(12)  | -0.0012(12) | 0.0057(11)  |
| O22 | 0.0272(16) | 0.0095(13) | 0.0160(13) | -0.0030(10) | 0.0010(11)  | -0.0013(11) |
| O23 | 0.0200(14) | 0.0088(12) | 0.0186(14) | 0.0042(10)  | -0.0023(11) | -0.0003(10) |
| S2  | 0.0146(5)  | 0.0077(4)  | 0.0118(4)  | 0.0003(3)   | 0.0013(3)   | 0.0024(3)   |
| F21 | 0.066(2)   | 0.0255(14) | 0.0187(13) | -0.0104(11) | 0.0009(13)  | 0.0140(14)  |
| F22 | 0.0258(14) | 0.0467(18) | 0.0380(16) | 0.0177(14)  | 0.0160(12)  | 0.0208(13)  |
| F23 | 0.0549(18) | 0.0269(14) | 0.0214(13) | 0.0145(11)  | 0.0143(12)  | 0.0217(13)  |

**Table S9.** Hydrogen atomic coordinates and isotropic atomic displacement parameters ( $\text{\AA}^2$ ) for  $\text{Cu}^{2+}$ BIM

---

|     | $x/a$  | $y/b$   | $z/c$  | $U(\text{eq})$ |
|-----|--------|---------|--------|----------------|
| H4  | 0.4415 | 0.0306  | 0.6086 | 0.018000       |
| H1  | 0.7395 | 0.7092  | 0.7839 | 0.022000       |
| H2  | 0.9179 | 0.8483  | 0.8896 | 0.024000       |
| H3  | 1.1288 | 0.7851  | 0.9761 | 0.023000       |
| H4A | 1.1578 | 0.5819  | 0.9532 | 0.022000       |
| H6  | 1.0527 | 0.3706  | 0.8668 | 0.019000       |
| H8  | 1.1035 | 0.2139  | 0.8100 | 0.022000       |
| H9  | 1.1114 | 0.0120  | 0.7725 | 0.025000       |
| H10 | 0.8834 | -0.1107 | 0.6860 | 0.025000       |

|      | <b>x/a</b> | <b>y/b</b> | <b>z/c</b> | <b>U(eq)</b> |
|------|------------|------------|------------|--------------|
| H11  | 0.6536     | -0.0274    | 0.6361     | 0.019000     |
| H15  | 0.1238     | 0.0538     | 0.5286     | 0.019000     |
| H16  | -0.0438    | 0.2003     | 0.5057     | 0.021000     |
| H17  | 0.0561     | 0.4008     | 0.5571     | 0.023000     |
| H18  | 0.3238     | 0.4603     | 0.6341     | 0.021000     |
| H11W | 0.6697     | 0.4863     | 0.5760     | 0.038000     |
| H12W | 0.6650     | 0.5853     | 0.6160     | 0.038000     |
| H22W | 0.4875     | 0.5488     | 0.8348     | 0.038000     |
| H21W | 0.4406     | 0.4481     | 0.8215     | 0.038000     |

## Computational output data for Cu<sup>2+</sup>BIM

Table S10. Cartesian coordinates for Cu<sup>2+</sup>BIM (angstroms)

| atom |    | x          | y          | z          |
|------|----|------------|------------|------------|
| Cu1  | 1  | -0.5580662 | -0.6763629 | -0.3253296 |
| N1   | 2  | -2.5859122 | -0.9589293 | -0.1116355 |
| N2   | 3  | -1.1084366 | 1.2195968  | 0.2296194  |
| N3   | 4  | 1.3724416  | -0.1802497 | -0.2250015 |
| N4   | 5  | 3.1226147  | 0.9901018  | 0.4997509  |
| H4   | 6  | 3.6684845  | 1.7760540  | 0.8664898  |
| O1   | 7  | -0.4553130 | -1.8834563 | -2.1558287 |
| O2   | 8  | -0.2816331 | -2.4653674 | 1.0260700  |
| C1   | 9  | -3.3440017 | -2.0066011 | -0.4649532 |
| H1   | 10 | -2.8535066 | -2.8039459 | -1.0404187 |
| C2   | 11 | -4.7077914 | -2.0880909 | -0.1327218 |
| H2   | 12 | -5.2931070 | -2.9610921 | -0.4518516 |
| C3   | 13 | -5.2902338 | -1.0513963 | 0.6020087  |
| H3   | 14 | -6.3529605 | -1.0894230 | 0.8810295  |
| C4   | 15 | -4.5035968 | 0.0517564  | 0.9575739  |
| H4   | 16 | -4.9352387 | 0.9005694  | 1.5055608  |
| C5   | 17 | -3.1588323 | 0.0788637  | 0.5676678  |
| C6   | 18 | -2.3068581 | 1.2398733  | 0.7433954  |
| H6   | 19 | -2.7002323 | 2.1377288  | 1.2514123  |
| C7   | 20 | -0.3466616 | 2.3747021  | 0.0324442  |
| C8   | 21 | -1.0007626 | 3.6006806  | -0.2243293 |
| H8   | 22 | -2.0939912 | 3.6246170  | -0.3123387 |
| C9   | 23 | -0.2723858 | 4.7684357  | -0.4185648 |
| H9   | 24 | -0.7937949 | 5.7143334  | -0.6134330 |
| C10  | 25 | 1.1314812  | 4.7244525  | -0.4002029 |
| H10  | 26 | 1.7126175  | 5.6359398  | -0.5858975 |
| C11  | 27 | 1.7917759  | 3.5109413  | -0.2005235 |
| H11  | 28 | 2.8861081  | 3.4966052  | -0.2771714 |
| C12  | 29 | 1.0795844  | 2.3110032  | 0.0043965  |
| C13  | 30 | 1.8121542  | 1.0540881  | 0.1136635  |
| C14  | 31 | 3.5587612  | -0.3248664 | 0.4215591  |
| C15  | 32 | 4.7922752  | -0.9250773 | 0.6929890  |
| H15  | 33 | 5.6557141  | -0.3492162 | 1.0508617  |
| C16  | 34 | 4.8824303  | -2.2983652 | 0.4564386  |
| H16  | 35 | 5.8330757  | -2.8121793 | 0.6492202  |
| C17  | 36 | 3.7843508  | -3.0423626 | -0.0396470 |
| H17  | 37 | 3.9081559  | -4.1179281 | -0.2217893 |
| C18  | 38 | 2.5546467  | -2.4405646 | -0.3016448 |
| H18  | 39 | 1.7060528  | -3.0271368 | -0.6757158 |
| C19  | 40 | 2.4391419  | -1.0603007 | -0.0520329 |

|     |    |            |            |            |
|-----|----|------------|------------|------------|
| H19 | 41 | 0.0797421  | -1.5130256 | -2.8888475 |
| H12 | 42 | -0.3291436 | -2.8545406 | -2.1914187 |
| H22 | 43 | -1.0509336 | -2.7757074 | 1.5465948  |
| H21 | 44 | 0.4617651  | -2.4104307 | 1.6646211  |

**Table S11.** Condensed population analysis for Cu<sup>2+</sup>BIM

|    |   |     | alpha | beta  | charge | spin         |
|----|---|-----|-------|-------|--------|--------------|
| 1  | 1 | Cu1 | 1s    | 1.000 | 1.000  | 2.000 0.000  |
| 2  | 1 | Cu1 | 2s    | 1.000 | 1.000  | 2.000 0.000  |
| 3  | 1 | Cu1 | 3s    | 0.998 | 0.999  | 1.997 -0.001 |
| 4  | 1 | Cu1 | 4s    | 0.181 | 0.177  | 0.358 0.005  |
| 5  | 1 | Cu1 | 2p    | 3.000 | 3.000  | 6.000 0.000  |
| 6  | 1 | Cu1 | 3p    | 2.995 | 2.996  | 5.992 -0.001 |
| 7  | 1 | Cu1 | 4p    | 0.255 | 0.253  | 0.508 0.003  |
| 8  | 1 | Cu1 | 3d    | 5.026 | 4.571  | 9.597 0.456  |
| 9  | 2 | N1  | 1s    | 1.000 | 1.000  | 2.000 0.000  |
| 10 | 2 | N1  | 2s    | 0.786 | 0.770  | 1.557 0.016  |
| 11 | 2 | N1  | 2p    | 1.903 | 1.827  | 3.730 0.076  |
| 12 | 2 | N1  | 3d    | 0.031 | 0.030  | 0.061 0.000  |
| 13 | 3 | N2  | 1s    | 1.000 | 1.000  | 2.000 -0.000 |
| 14 | 3 | N2  | 2s    | 0.783 | 0.762  | 1.545 0.021  |
| 15 | 3 | N2  | 2p    | 1.906 | 1.789  | 3.695 0.117  |
| 16 | 3 | N2  | 3d    | 0.031 | 0.031  | 0.062 0.000  |
| 17 | 4 | N3  | 1s    | 1.000 | 1.000  | 2.000 0.000  |
| 18 | 4 | N3  | 2s    | 0.796 | 0.779  | 1.575 0.017  |
| 19 | 4 | N3  | 2p    | 1.929 | 1.846  | 3.775 0.083  |
| 20 | 4 | N3  | 3d    | 0.030 | 0.030  | 0.060 0.001  |
| 21 | 5 | N4  | 1s    | 1.000 | 1.000  | 2.000 0.000  |
| 22 | 5 | N4  | 2s    | 0.720 | 0.719  | 1.439 0.000  |
| 23 | 5 | N4  | 2p    | 1.917 | 1.918  | 3.835 -0.001 |
| 24 | 5 | N4  | 3d    | 0.029 | 0.029  | 0.058 0.000  |
| 25 | 6 | H4  | 1s    | 0.328 | 0.328  | 0.656 0.000  |
| 26 | 6 | H4  | 2p    | 0.023 | 0.023  | 0.046 0.000  |
| 27 | 7 | O1  | 1s    | 1.000 | 1.000  | 2.000 0.000  |
| 28 | 7 | O1  | 2s    | 0.844 | 0.843  | 1.687 0.002  |
| 29 | 7 | O1  | 2p    | 2.417 | 2.397  | 4.814 0.020  |
| 30 | 7 | O1  | 3d    | 0.011 | 0.011  | 0.022 0.000  |
| 31 | 8 | O2  | 1s    | 1.000 | 1.000  | 2.000 0.000  |
| 32 | 8 | O2  | 2s    | 0.846 | 0.845  | 1.691 0.001  |
| 33 | 8 | O2  | 2p    | 2.413 | 2.401  | 4.814 0.013  |
| 34 | 8 | O2  | 3d    | 0.011 | 0.011  | 0.023 0.000  |
| 35 | 9 | C1  | 1s    | 1.000 | 1.000  | 2.000 0.000  |
| 36 | 9 | C1  | 2s    | 0.607 | 0.607  | 1.214 -0.000 |
| 37 | 9 | C1  | 2p    | 1.340 | 1.344  | 2.683 -0.004 |
| 38 | 9 | C1  | 3d    | 0.035 | 0.034  | 0.069 0.001  |

|    |    |    |    |       |       |       |        |
|----|----|----|----|-------|-------|-------|--------|
| 39 | 10 | H1 | 1s | 0.399 | 0.394 | 0.793 | 0.004  |
| 40 | 10 | H1 | 2p | 0.013 | 0.013 | 0.026 | 0.000  |
| 41 | 11 | C2 | 1s | 1.000 | 1.000 | 2.000 | 0.000  |
| 42 | 11 | C2 | 2s | 0.620 | 0.620 | 1.240 | 0.001  |
| 43 | 11 | C2 | 2p | 1.417 | 1.411 | 2.828 | 0.005  |
| 44 | 11 | C2 | 3d | 0.024 | 0.024 | 0.048 | 0.000  |
| 45 | 12 | H2 | 1s | 0.379 | 0.378 | 0.757 | 0.001  |
| 46 | 12 | H2 | 2p | 0.013 | 0.013 | 0.027 | 0.000  |
| 47 | 13 | C3 | 1s | 1.000 | 1.000 | 2.000 | 0.000  |
| 48 | 13 | C3 | 2s | 0.619 | 0.620 | 1.239 | -0.000 |
| 49 | 13 | C3 | 2p | 1.392 | 1.396 | 2.788 | -0.004 |
| 50 | 13 | C3 | 3d | 0.025 | 0.025 | 0.050 | 0.000  |
| 51 | 14 | H3 | 1s | 0.380 | 0.379 | 0.759 | 0.000  |
| 52 | 14 | H3 | 2p | 0.013 | 0.013 | 0.027 | 0.000  |
| 53 | 15 | C4 | 1s | 1.000 | 1.000 | 2.000 | 0.000  |
| 54 | 15 | C4 | 2s | 0.630 | 0.630 | 1.260 | -0.000 |
| 55 | 15 | C4 | 2p | 1.413 | 1.413 | 2.826 | 0.000  |
| 56 | 15 | C4 | 3d | 0.024 | 0.024 | 0.049 | 0.000  |
| 57 | 16 | H4 | 1s | 0.384 | 0.383 | 0.767 | 0.002  |
| 58 | 16 | H4 | 2p | 0.014 | 0.014 | 0.027 | 0.000  |
| 59 | 17 | C5 | 1s | 1.000 | 1.000 | 2.000 | 0.000  |
| 60 | 17 | C5 | 2s | 0.592 | 0.592 | 1.184 | 0.000  |
| 61 | 17 | C5 | 2p | 1.256 | 1.253 | 2.509 | 0.004  |
| 62 | 17 | C5 | 3d | 0.042 | 0.041 | 0.083 | 0.001  |
| 63 | 18 | C6 | 1s | 1.000 | 1.000 | 2.000 | 0.000  |
| 64 | 18 | C6 | 2s | 0.623 | 0.624 | 1.247 | -0.001 |
| 65 | 18 | C6 | 2p | 1.323 | 1.334 | 2.657 | -0.011 |
| 66 | 18 | C6 | 3d | 0.036 | 0.034 | 0.071 | 0.002  |
| 67 | 19 | H6 | 1s | 0.391 | 0.379 | 0.770 | 0.013  |
| 68 | 19 | H6 | 2p | 0.014 | 0.014 | 0.028 | 0.000  |
| 69 | 20 | C7 | 1s | 1.000 | 1.000 | 2.000 | 0.000  |
| 70 | 20 | C7 | 2s | 0.604 | 0.604 | 1.207 | -0.000 |
| 71 | 20 | C7 | 2p | 1.273 | 1.258 | 2.531 | 0.015  |
| 72 | 20 | C7 | 3d | 0.041 | 0.039 | 0.081 | 0.002  |
| 73 | 21 | C8 | 1s | 1.000 | 1.000 | 2.000 | 0.000  |
| 74 | 21 | C8 | 2s | 0.623 | 0.622 | 1.245 | 0.001  |
| 75 | 21 | C8 | 2p | 1.435 | 1.424 | 2.859 | 0.011  |
| 76 | 21 | C8 | 3d | 0.025 | 0.025 | 0.049 | 0.000  |
| 77 | 22 | H8 | 1s | 0.396 | 0.396 | 0.792 | -0.000 |
| 78 | 22 | H8 | 2p | 0.014 | 0.014 | 0.028 | 0.000  |
| 79 | 23 | C9 | 1s | 1.000 | 1.000 | 2.000 | 0.000  |
| 80 | 23 | C9 | 2s | 0.617 | 0.617 | 1.233 | 0.000  |
| 81 | 23 | C9 | 2p | 1.412 | 1.406 | 2.818 | 0.006  |
| 82 | 23 | C9 | 3d | 0.025 | 0.025 | 0.050 | 0.000  |
| 83 | 24 | H9 | 1s | 0.387 | 0.386 | 0.773 | 0.001  |
| 84 | 24 | H9 | 2p | 0.014 | 0.014 | 0.027 | 0.000  |



|        |     |    |       |       |       |        |
|--------|-----|----|-------|-------|-------|--------|
| 85 25  | C10 | 1s | 1.000 | 1.000 | 2.000 | 0.000  |
| 86 25  | C10 | 2s | 0.617 | 0.616 | 1.232 | 0.001  |
| 87 25  | C10 | 2p | 1.422 | 1.396 | 2.818 | 0.025  |
| 88 25  | C10 | 3d | 0.025 | 0.025 | 0.050 | 0.000  |
| 89 26  | H10 | 1s | 0.385 | 0.386 | 0.772 | -0.001 |
| 90 26  | H10 | 2p | 0.014 | 0.013 | 0.027 | 0.000  |
| 91 27  | C11 | 1s | 1.000 | 1.000 | 2.000 | 0.000  |
| 92 27  | C11 | 2s | 0.622 | 0.623 | 1.245 | -0.001 |
| 93 27  | C11 | 2p | 1.419 | 1.425 | 2.844 | -0.006 |
| 94 27  | C11 | 3d | 0.025 | 0.025 | 0.050 | 0.000  |
| 95 28  | H11 | 1s | 0.401 | 0.401 | 0.802 | 0.000  |
| 96 28  | H11 | 2p | 0.014 | 0.014 | 0.028 | 0.000  |
| 97 29  | C12 | 1s | 1.000 | 1.000 | 1.999 | 0.000  |
| 98 29  | C12 | 2s | 0.636 | 0.635 | 1.271 | 0.001  |
| 99 29  | C12 | 2p | 1.344 | 1.318 | 2.663 | 0.026  |
| 100 29 | C12 | 3d | 0.031 | 0.031 | 0.062 | 0.000  |
| 101 30 | C13 | 1s | 1.000 | 1.000 | 2.000 | 0.000  |
| 102 30 | C13 | 2s | 0.579 | 0.578 | 1.158 | 0.001  |
| 103 30 | C13 | 2p | 1.201 | 1.194 | 2.396 | 0.007  |
| 104 30 | C13 | 3d | 0.053 | 0.051 | 0.104 | 0.001  |
| 105 31 | C14 | 1s | 1.000 | 1.000 | 2.000 | 0.000  |
| 106 31 | C14 | 2s | 0.589 | 0.588 | 1.177 | 0.001  |
| 107 31 | C14 | 2p | 1.292 | 1.276 | 2.568 | 0.015  |
| 108 31 | C14 | 3d | 0.041 | 0.041 | 0.083 | 0.000  |
| 109 32 | C15 | 1s | 1.000 | 1.000 | 2.000 | 0.000  |
| 110 32 | C15 | 2s | 0.621 | 0.621 | 1.242 | -0.000 |
| 111 32 | C15 | 2p | 1.421 | 1.421 | 2.842 | -0.001 |
| 112 32 | C15 | 3d | 0.025 | 0.024 | 0.049 | 0.000  |
| 113 33 | H15 | 1s | 0.396 | 0.395 | 0.791 | 0.001  |
| 114 33 | H15 | 2p | 0.014 | 0.014 | 0.028 | 0.000  |
| 115 34 | C16 | 1s | 1.000 | 1.000 | 2.000 | 0.000  |
| 116 34 | C16 | 2s | 0.617 | 0.616 | 1.233 | 0.001  |
| 117 34 | C16 | 2p | 1.436 | 1.410 | 2.846 | 0.026  |
| 118 34 | C16 | 3d | 0.025 | 0.025 | 0.050 | 0.000  |
| 119 35 | H16 | 1s | 0.389 | 0.390 | 0.779 | -0.001 |
| 120 35 | H16 | 2p | 0.014 | 0.013 | 0.027 | 0.000  |
| 121 36 | C17 | 1s | 1.000 | 1.000 | 2.000 | 0.000  |
| 122 36 | C17 | 2s | 0.613 | 0.613 | 1.226 | -0.000 |
| 123 36 | C17 | 2p | 1.421 | 1.422 | 2.843 | -0.000 |
| 124 36 | C17 | 3d | 0.025 | 0.025 | 0.050 | 0.000  |
| 125 37 | H17 | 1s | 0.394 | 0.394 | 0.787 | 0.000  |
| 126 37 | H17 | 2p | 0.014 | 0.014 | 0.027 | 0.000  |
| 127 38 | C18 | 1s | 1.000 | 1.000 | 2.000 | 0.000  |
| 128 38 | C18 | 2s | 0.623 | 0.623 | 1.247 | 0.000  |
| 129 38 | C18 | 2p | 1.435 | 1.426 | 2.862 | 0.009  |
| 130 38 | C18 | 3d | 0.025 | 0.025 | 0.049 | 0.000  |

|        |     |    |       |       |       |       |
|--------|-----|----|-------|-------|-------|-------|
| 131 39 | H18 | 1s | 0.421 | 0.421 | 0.843 | 0.000 |
| 132 39 | H18 | 2p | 0.014 | 0.014 | 0.028 | 0.000 |
| 133 40 | C19 | 1s | 1.000 | 1.000 | 2.000 | 0.000 |
| 134 40 | C19 | 2s | 0.597 | 0.597 | 1.194 | 0.000 |
| 135 40 | C19 | 2p | 1.300 | 1.288 | 2.588 | 0.012 |
| 136 40 | C19 | 3d | 0.042 | 0.041 | 0.083 | 0.001 |
| 137 41 | H19 | 1s | 0.295 | 0.294 | 0.589 | 0.001 |
| 138 41 | H19 | 2p | 0.031 | 0.031 | 0.062 | 0.000 |
| 139 42 | H12 | 1s | 0.300 | 0.300 | 0.599 | 0.000 |
| 140 42 | H12 | 2p | 0.031 | 0.031 | 0.062 | 0.000 |
| 141 43 | H22 | 1s | 0.301 | 0.301 | 0.602 | 0.001 |
| 142 43 | H22 | 2p | 0.031 | 0.031 | 0.063 | 0.000 |
| 143 44 | H21 | 1s | 0.296 | 0.296 | 0.592 | 0.000 |
| 144 44 | H21 | 2p | 0.031 | 0.031 | 0.062 | 0.000 |

### Computational output data for Cu<sup>2+</sup>BIMA

**Table S12.** Cartesian coordinates for Cu<sup>2+</sup>BIMA (angstroms)

| atom |    | x          | y          | z          |
|------|----|------------|------------|------------|
| Cu1  | 1  | 0.5626500  | -0.7184851 | -0.1209832 |
| N1   | 2  | 2.5527944  | -0.9714771 | -0.0570114 |
| N3   | 3  | -1.3210784 | -0.2228154 | -0.0463763 |
| N4   | 4  | -3.1856877 | 0.9595743  | 0.0960628  |
| H4   | 5  | -3.8243713 | 1.7571812  | 0.1260508  |
| O1   | 6  | 0.3866772  | -2.1787597 | -1.8625790 |
| O2   | 7  | 0.3638227  | -2.3158119 | 1.4086820  |
| C1   | 8  | 3.2268374  | -2.0999343 | -0.3693470 |
| H1   | 9  | 2.6349657  | -2.9379063 | -0.7576403 |
| C2   | 10 | 4.6136997  | -2.1796772 | -0.2299204 |
| H2   | 11 | 5.1359788  | -3.1041536 | -0.5091998 |
| C3   | 12 | 5.3110611  | -1.0631083 | 0.2477134  |
| H3   | 13 | 6.4025880  | -1.0974253 | 0.3636475  |
| C4   | 14 | 4.6078103  | 0.1088550  | 0.5477002  |
| H4   | 15 | 5.1339079  | 1.0086175  | 0.8939681  |
| C5   | 16 | 3.2206200  | 0.1273308  | 0.3800913  |
| C7   | 17 | 0.2913250  | 2.4435475  | -0.2075641 |
| C8   | 18 | 0.8722586  | 3.7166720  | -0.3031447 |
| H8   | 19 | 1.9512744  | 3.8163818  | -0.4858644 |
| C9   | 20 | 0.1046008  | 4.8770655  | -0.1937382 |
| H9   | 21 | 0.5840644  | 5.8609751  | -0.2705327 |
| C10  | 22 | -1.2734095 | 4.7653064  | 0.0091738  |
| H10  | 23 | -1.8970402 | 5.6636069  | 0.1024933  |

|     |    |            |            |            |
|-----|----|------------|------------|------------|
| C11 | 24 | -1.8602819 | 3.5046684  | 0.0710182  |
| H11 | 25 | -2.9464947 | 3.4684224  | 0.2210236  |
| C12 | 26 | -1.1095434 | 2.3097286  | -0.0407336 |
| C13 | 27 | -1.8237297 | 1.0302390  | 0.0008121  |
| C14 | 28 | -3.5860197 | -0.3656052 | 0.1210033  |
| C15 | 29 | -4.8530174 | -0.9555399 | 0.1997118  |
| H15 | 30 | -5.7714873 | -0.3585988 | 0.2711029  |
| C16 | 31 | -4.8938414 | -2.3482565 | 0.1829174  |
| H16 | 32 | -5.8651186 | -2.8591190 | 0.2376217  |
| C17 | 33 | -3.7118606 | -3.1187801 | 0.0881956  |
| H17 | 34 | -3.7918623 | -4.2124796 | 0.0758190  |
| C18 | 35 | -2.4496139 | -2.5258894 | 0.0150254  |
| H18 | 36 | -1.5472725 | -3.1470164 | -0.0494516 |
| C19 | 37 | -2.3915635 | -1.1209512 | 0.0249394  |
| H19 | 38 | -0.0559292 | -1.8837813 | -2.6852727 |
| H12 | 39 | 0.0811623  | -3.1002568 | -1.7259682 |
| H22 | 40 | 1.0963738  | -2.4812292 | 2.0381924  |
| H21 | 41 | -0.4630647 | -2.3234009 | 1.9391108  |
| N2  | 42 | 1.1934109  | 1.2929058  | -0.3187222 |
| H23 | 43 | 1.5557985  | 1.2549187  | -1.2909149 |
| C6  | 44 | 2.3644259  | 1.3427656  | 0.6159030  |
| H7  | 45 | 1.9709528  | 1.3755055  | 1.6511057  |
| H13 | 46 | 2.9603453  | 2.2642232  | 0.4692597  |

**Table S13.** Condensed population analysis for **Cu<sup>2+</sup>BIMA**

|    |   |     | alpha | beta  | charge | spin  |        |
|----|---|-----|-------|-------|--------|-------|--------|
| 1  | 1 | Cu1 | 1s    | 1.000 | 1.000  | 2.000 | 0.000  |
| 2  | 1 | Cu1 | 2s    | 1.000 | 1.000  | 2.000 | 0.000  |
| 3  | 1 | Cu1 | 3s    | 0.998 | 0.999  | 1.997 | -0.001 |
| 4  | 1 | Cu1 | 4s    | 0.204 | 0.185  | 0.389 | 0.019  |
| 5  | 1 | Cu1 | 2p    | 3.000 | 3.000  | 6.000 | 0.000  |
| 6  | 1 | Cu1 | 3p    | 2.995 | 2.996  | 5.991 | -0.002 |
| 7  | 1 | Cu1 | 4p    | 0.256 | 0.255  | 0.510 | 0.001  |
| 8  | 1 | Cu1 | 3d    | 5.032 | 4.549  | 9.581 | 0.483  |
| 9  | 2 | N1  | 1s    | 1.000 | 1.000  | 2.000 | 0.000  |
| 10 | 2 | N1  | 2s    | 0.781 | 0.764  | 1.544 | 0.017  |
| 11 | 2 | N1  | 2p    | 1.919 | 1.827  | 3.746 | 0.092  |
| 12 | 2 | N1  | 3d    | 0.031 | 0.031  | 0.061 | 0.000  |
| 13 | 3 | N3  | 1s    | 1.000 | 1.000  | 2.000 | 0.000  |
| 14 | 3 | N3  | 2s    | 0.793 | 0.773  | 1.567 | 0.020  |
| 15 | 3 | N3  | 2p    | 1.945 | 1.861  | 3.806 | 0.084  |
| 16 | 3 | N3  | 3d    | 0.030 | 0.030  | 0.060 | 0.000  |
| 17 | 4 | N4  | 1s    | 1.000 | 1.000  | 2.000 | 0.000  |
| 18 | 4 | N4  | 2s    | 0.718 | 0.717  | 1.435 | 0.001  |
| 19 | 4 | N4  | 2p    | 1.918 | 1.916  | 3.835 | 0.002  |

|    |    |    |    |       |       |       |        |
|----|----|----|----|-------|-------|-------|--------|
| 20 | 4  | N4 | 3d | 0.029 | 0.029 | 0.058 | 0.000  |
| 21 | 5  | H4 | 1s | 0.332 | 0.331 | 0.663 | 0.001  |
| 22 | 5  | H4 | 2p | 0.024 | 0.024 | 0.047 | 0.000  |
| 23 | 6  | O1 | 1s | 1.000 | 1.000 | 2.000 | 0.000  |
| 24 | 6  | O1 | 2s | 0.847 | 0.846 | 1.693 | 0.001  |
| 25 | 6  | O1 | 2p | 2.418 | 2.400 | 4.817 | 0.018  |
| 26 | 6  | O1 | 3d | 0.011 | 0.011 | 0.022 | 0.000  |
| 27 | 7  | O2 | 1s | 1.000 | 1.000 | 2.000 | 0.000  |
| 28 | 7  | O2 | 2s | 0.845 | 0.842 | 1.686 | 0.003  |
| 29 | 7  | O2 | 2p | 2.420 | 2.396 | 4.816 | 0.024  |
| 30 | 7  | O2 | 3d | 0.011 | 0.011 | 0.022 | 0.000  |
| 31 | 8  | C1 | 1s | 1.000 | 1.000 | 2.000 | 0.000  |
| 32 | 8  | C1 | 2s | 0.605 | 0.605 | 1.209 | -0.000 |
| 33 | 8  | C1 | 2p | 1.337 | 1.340 | 2.677 | -0.003 |
| 34 | 8  | C1 | 3d | 0.035 | 0.033 | 0.068 | 0.002  |
| 35 | 9  | H1 | 1s | 0.398 | 0.394 | 0.793 | 0.004  |
| 36 | 9  | H1 | 2p | 0.013 | 0.013 | 0.027 | 0.000  |
| 37 | 10 | C2 | 1s | 1.000 | 1.000 | 2.000 | 0.000  |
| 38 | 10 | C2 | 2s | 0.618 | 0.618 | 1.236 | 0.001  |
| 39 | 10 | C2 | 2p | 1.422 | 1.414 | 2.836 | 0.008  |
| 40 | 10 | C2 | 3d | 0.024 | 0.024 | 0.048 | 0.000  |
| 41 | 11 | H2 | 1s | 0.382 | 0.380 | 0.762 | 0.001  |
| 42 | 11 | H2 | 2p | 0.014 | 0.014 | 0.027 | 0.000  |
| 43 | 12 | C3 | 1s | 1.000 | 1.000 | 2.000 | 0.000  |
| 44 | 12 | C3 | 2s | 0.619 | 0.620 | 1.239 | -0.000 |
| 45 | 12 | C3 | 2p | 1.392 | 1.396 | 2.788 | -0.004 |
| 46 | 12 | C3 | 3d | 0.025 | 0.025 | 0.051 | 0.000  |
| 47 | 13 | H3 | 1s | 0.382 | 0.381 | 0.763 | 0.001  |
| 48 | 13 | H3 | 2p | 0.013 | 0.013 | 0.027 | 0.000  |
| 49 | 14 | C4 | 1s | 1.000 | 1.000 | 1.999 | 0.000  |
| 50 | 14 | C4 | 2s | 0.623 | 0.623 | 1.247 | 0.000  |
| 51 | 14 | C4 | 2p | 1.420 | 1.415 | 2.835 | 0.005  |
| 52 | 14 | C4 | 3d | 0.024 | 0.024 | 0.048 | 0.000  |
| 53 | 15 | H4 | 1s | 0.387 | 0.385 | 0.771 | 0.002  |
| 54 | 15 | H4 | 2p | 0.014 | 0.014 | 0.027 | 0.000  |
| 55 | 16 | C5 | 1s | 1.000 | 1.000 | 2.000 | 0.000  |
| 56 | 16 | C5 | 2s | 0.594 | 0.594 | 1.188 | -0.000 |
| 57 | 16 | C5 | 2p | 1.267 | 1.268 | 2.535 | -0.000 |
| 58 | 16 | C5 | 3d | 0.042 | 0.040 | 0.082 | 0.001  |
| 59 | 17 | C7 | 1s | 1.000 | 1.000 | 2.000 | 0.000  |
| 60 | 17 | C7 | 2s | 0.603 | 0.604 | 1.207 | -0.001 |
| 61 | 17 | C7 | 2p | 1.282 | 1.283 | 2.564 | -0.001 |
| 62 | 17 | C7 | 3d | 0.038 | 0.037 | 0.075 | 0.002  |
| 63 | 18 | C8 | 1s | 1.000 | 1.000 | 2.000 | 0.000  |
| 64 | 18 | C8 | 2s | 0.619 | 0.618 | 1.237 | 0.001  |
| 65 | 18 | C8 | 2p | 1.432 | 1.424 | 2.856 | 0.008  |

|     |    |     |    |       |       |       |        |
|-----|----|-----|----|-------|-------|-------|--------|
| 66  | 18 | C8  | 3d | 0.025 | 0.025 | 0.050 | 0.000  |
| 67  | 19 | H8  | 1s | 0.403 | 0.404 | 0.807 | -0.001 |
| 68  | 19 | H8  | 2p | 0.014 | 0.014 | 0.028 | 0.000  |
| 69  | 20 | C9  | 1s | 1.000 | 1.000 | 2.000 | 0.000  |
| 70  | 20 | C9  | 2s | 0.616 | 0.616 | 1.232 | 0.000  |
| 71  | 20 | C9  | 2p | 1.411 | 1.411 | 2.822 | 0.001  |
| 72  | 20 | C9  | 3d | 0.025 | 0.025 | 0.050 | 0.000  |
| 73  | 21 | H9  | 1s | 0.389 | 0.388 | 0.777 | 0.002  |
| 74  | 21 | H9  | 2p | 0.013 | 0.013 | 0.027 | 0.000  |
| 75  | 22 | C10 | 1s | 1.000 | 1.000 | 2.000 | 0.000  |
| 76  | 22 | C10 | 2s | 0.613 | 0.613 | 1.227 | 0.000  |
| 77  | 22 | C10 | 2p | 1.413 | 1.412 | 2.825 | 0.001  |
| 78  | 22 | C10 | 3d | 0.025 | 0.025 | 0.050 | 0.000  |
| 79  | 23 | H10 | 1s | 0.388 | 0.388 | 0.776 | 0.000  |
| 80  | 23 | H10 | 2p | 0.013 | 0.013 | 0.027 | 0.000  |
| 81  | 24 | C11 | 1s | 1.000 | 1.000 | 2.000 | 0.000  |
| 82  | 24 | C11 | 2s | 0.622 | 0.622 | 1.243 | -0.000 |
| 83  | 24 | C11 | 2p | 1.420 | 1.421 | 2.841 | -0.001 |
| 84  | 24 | C11 | 3d | 0.025 | 0.025 | 0.050 | 0.000  |
| 85  | 25 | H11 | 1s | 0.415 | 0.415 | 0.831 | 0.000  |
| 86  | 25 | H11 | 2p | 0.014 | 0.014 | 0.028 | 0.000  |
| 87  | 26 | C12 | 1s | 1.000 | 1.000 | 2.000 | 0.000  |
| 88  | 26 | C12 | 2s | 0.635 | 0.635 | 1.270 | 0.000  |
| 89  | 26 | C12 | 2p | 1.319 | 1.314 | 2.633 | 0.004  |
| 90  | 26 | C12 | 3d | 0.031 | 0.031 | 0.062 | 0.000  |
| 91  | 27 | C13 | 1s | 1.000 | 1.000 | 2.000 | 0.000  |
| 92  | 27 | C13 | 2s | 0.581 | 0.580 | 1.161 | 0.001  |
| 93  | 27 | C13 | 2p | 1.188 | 1.192 | 2.380 | -0.004 |
| 94  | 27 | C13 | 3d | 0.052 | 0.051 | 0.104 | 0.001  |
| 95  | 28 | C14 | 1s | 1.000 | 1.000 | 2.000 | 0.000  |
| 96  | 28 | C14 | 2s | 0.589 | 0.588 | 1.176 | 0.001  |
| 97  | 28 | C14 | 2p | 1.289 | 1.284 | 2.573 | 0.005  |
| 98  | 28 | C14 | 3d | 0.042 | 0.042 | 0.083 | 0.000  |
| 99  | 29 | C15 | 1s | 1.000 | 1.000 | 2.000 | 0.000  |
| 100 | 29 | C15 | 2s | 0.621 | 0.621 | 1.241 | 0.000  |
| 101 | 29 | C15 | 2p | 1.422 | 1.422 | 2.844 | 0.001  |
| 102 | 29 | C15 | 3d | 0.025 | 0.025 | 0.049 | 0.000  |
| 103 | 30 | H15 | 1s | 0.397 | 0.395 | 0.792 | 0.001  |
| 104 | 30 | H15 | 2p | 0.014 | 0.014 | 0.028 | 0.000  |
| 105 | 31 | C16 | 1s | 1.000 | 1.000 | 2.000 | 0.000  |
| 106 | 31 | C16 | 2s | 0.615 | 0.615 | 1.230 | 0.000  |
| 107 | 31 | C16 | 2p | 1.425 | 1.425 | 2.851 | 0.000  |
| 108 | 31 | C16 | 3d | 0.025 | 0.025 | 0.050 | 0.000  |
| 109 | 32 | H16 | 1s | 0.390 | 0.390 | 0.781 | 0.000  |
| 110 | 32 | H16 | 2p | 0.013 | 0.013 | 0.027 | 0.000  |
| 111 | 33 | C17 | 1s | 1.000 | 1.000 | 2.000 | 0.000  |

|        |     |    |       |       |       |        |
|--------|-----|----|-------|-------|-------|--------|
| 112 33 | C17 | 2s | 0.612 | 0.612 | 1.224 | 0.000  |
| 113 33 | C17 | 2p | 1.421 | 1.421 | 2.842 | -0.000 |
| 114 33 | C17 | 3d | 0.025 | 0.025 | 0.050 | 0.000  |
| 115 34 | H17 | 1s | 0.395 | 0.395 | 0.791 | 0.000  |
| 116 34 | H17 | 2p | 0.014 | 0.014 | 0.027 | 0.000  |
| 117 35 | C18 | 1s | 1.000 | 1.000 | 2.000 | 0.000  |
| 118 35 | C18 | 2s | 0.624 | 0.624 | 1.249 | 0.000  |
| 119 35 | C18 | 2p | 1.449 | 1.449 | 2.897 | 0.000  |
| 120 35 | C18 | 3d | 0.025 | 0.025 | 0.049 | 0.000  |
| 121 36 | H18 | 1s | 0.424 | 0.423 | 0.847 | 0.001  |
| 122 36 | H18 | 2p | 0.014 | 0.014 | 0.028 | 0.000  |
| 123 37 | C19 | 1s | 1.000 | 1.000 | 2.000 | 0.000  |
| 124 37 | C19 | 2s | 0.596 | 0.596 | 1.192 | 0.000  |
| 125 37 | C19 | 2p | 1.285 | 1.283 | 2.568 | 0.002  |
| 126 37 | C19 | 3d | 0.041 | 0.040 | 0.082 | 0.001  |
| 127 38 | H19 | 1s | 0.297 | 0.297 | 0.594 | 0.001  |
| 128 38 | H19 | 2p | 0.031 | 0.031 | 0.062 | 0.000  |
| 129 39 | H12 | 1s | 0.301 | 0.300 | 0.601 | 0.000  |
| 130 39 | H12 | 2p | 0.031 | 0.031 | 0.062 | 0.000  |
| 131 40 | H22 | 1s | 0.299 | 0.296 | 0.595 | 0.002  |
| 132 40 | H22 | 2p | 0.031 | 0.031 | 0.062 | 0.000  |
| 133 41 | H21 | 1s | 0.294 | 0.293 | 0.588 | 0.001  |
| 134 41 | H21 | 2p | 0.031 | 0.031 | 0.062 | 0.000  |
| 135 42 | N2  | 1s | 1.000 | 1.000 | 2.000 | -0.000 |
| 136 42 | N2  | 2s | 0.776 | 0.756 | 1.532 | 0.019  |
| 137 42 | N2  | 2p | 2.048 | 1.891 | 3.939 | 0.157  |
| 138 42 | N2  | 3d | 0.029 | 0.029 | 0.058 | 0.000  |
| 139 43 | H23 | 1s | 0.314 | 0.316 | 0.630 | -0.002 |
| 140 43 | H23 | 2p | 0.021 | 0.020 | 0.041 | 0.001  |
| 141 44 | C6  | 1s | 1.000 | 1.000 | 2.000 | 0.000  |
| 142 44 | C6  | 2s | 0.610 | 0.611 | 1.220 | -0.001 |
| 143 44 | C6  | 2p | 1.454 | 1.453 | 2.907 | 0.000  |
| 144 44 | C6  | 3d | 0.031 | 0.030 | 0.060 | 0.001  |
| 145 45 | H7  | 1s | 0.369 | 0.365 | 0.734 | 0.003  |
| 146 45 | H7  | 2p | 0.012 | 0.012 | 0.024 | 0.000  |
| 147 46 | H13 | 1s | 0.388 | 0.379 | 0.767 | 0.009  |
| 148 46 | H13 | 2p | 0.013 | 0.013 | 0.026 | 0.000  |

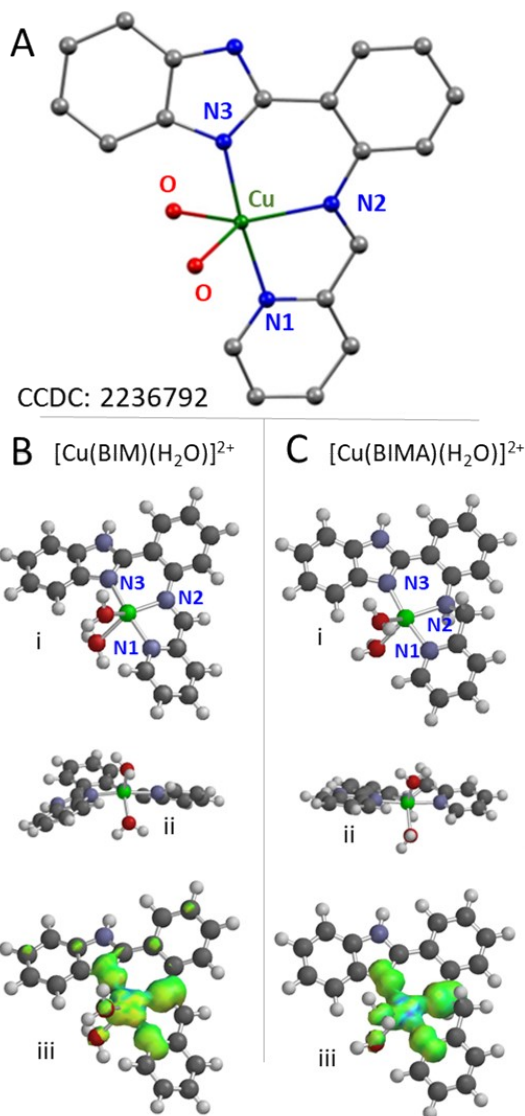

**Figure S7.** (A) Crystal structures of copper complex  $\text{Cu}^{2+}\text{BIM}$  shown as ADP plot. Triflate ions and H-atoms are removed for clarity. (B and C) DFT optimized, gas-phase structures of  $\text{Cu}^{2+}\text{BIM}$  (B, i) and  $\text{Cu}^{2+}\text{BIMA}$  (C, i). Selected bond lengths and angles are reported in Table 1. In both panels the ii structures are rotated images looking down the Cu—N2 axis as a means of demonstrating the ring strain in  $\text{Cu}^{2+}\text{BIM}$  and the relaxed structure in  $\text{Cu}^{2+}\text{BIMA}$ . Finally, iii structures showcase the calculated spin density delocalized in these complexes (shown in green).

Gas phase structures for both  $\text{Cu}^{2+}\text{BIM}$  and  $\text{Cu}^{2+}\text{BIMA}$  have been optimized computationally using DFT methods to give some insight into the coordination modes of these ligand complexes. Models using pBP/DN\* and pBP/DN\*\* converged to structures shown in Figure S7B and S7C. The DFT optimized structure of  $\text{Cu}^{2+}\text{BIM}$  shows structural similarity to the X-ray defined structure reported in Figure 2 and S7A. The 5-member chelate ring, which contains both Cu—N1 and Cu—N2 shows similar  $\sim 2.05$  Å bond lengths and a slightly stronger Cu—N3 bond ( $\sim 2.00$  Å). Interestingly, the BIM ligand in  $\text{Cu}^{2+}\text{BIMA}$  shows a planar configuration (Figure S7Bi and S7Bii). We associate this little twisted planar with overall ring strain from the 5- and 6-member chelate

rings binding the copper(II) to this primarily  $sp^2$  hybridized ligand. The DFT optimized model for  $\text{Cu}^{2+}\text{BIMA}$  shows a planar coordination mode, where some of the ring strain appears to be relieved through the flexibility of the  $sp^3$  hybridized methylene and secondary amine in the ligand backbone. There is more asymmetry in the Cu—N bonds, where the Cu—pyridine (Cu—N1) and Cu—benzimidazole (Cu—N3) are  $\sim 2.0$  Å and the Cu—N2 bond distance is a long 2.12 Å.

**Table S13.** Select bond lengths and angles for X-ray crystallographically characterized and DFT-optimized copper complexes.

|                        | $\text{Cu}^{2+}\text{BIM}$ | $\text{Cu}^{2+}\text{BIM}$ | $\text{Cu}^{2+}\text{BIMA}$ |
|------------------------|----------------------------|----------------------------|-----------------------------|
| Sample:                | X-ray Structure            | Theoretical model          | Theoretical model           |
| Cu—N1 (Å)              | 1.980(3)                   | 2.06                       | 2.01                        |
| Cu—N2 (Å)              | 2.047(3)                   | 2.05                       | 2.12                        |
| Cu—N3 (Å)              | 1.938(3)                   | 2.00                       | 1.95                        |
| Cu—OH <sub>2</sub> (Å) | 2.072(3)                   | 2.20                       | 2.22                        |
|                        | 2.124(3)                   | 2.26                       | 2.28                        |
| N1-Cu-N2 (o)           | 81.73(14)                  | 80.47                      | 80.06                       |
| N2-Cu-N3 (o)           | 92.57(13)                  | 90.93                      | 92.86                       |
| N1-Cu-N3 (o)           | 173.12(14)                 | 169.04                     | 171.49                      |



## K. Scheme S1: Control experiments

a) Without sulfanilamide

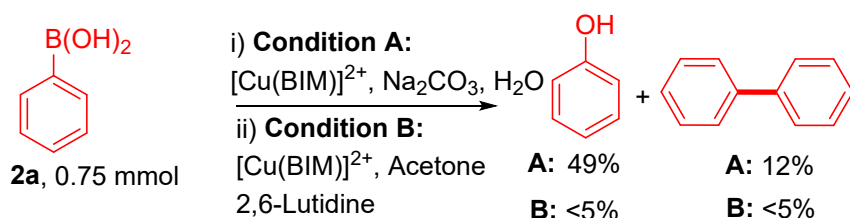

b) Without  $\text{PhB}(\text{OH})_2/[\text{Cu}(\text{BIM})]^{2+}$

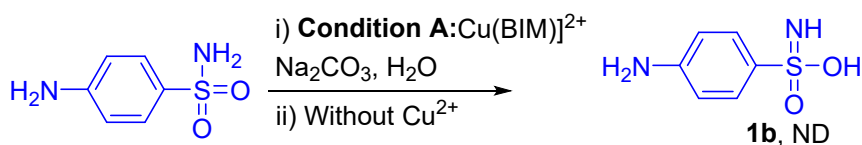

c) Without  $\text{PhB}(\text{OH})_2/[\text{Cu}(\text{BIM})]^{2+}$

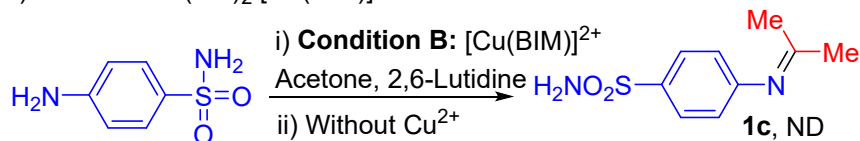

d) Condition B with NaOTf

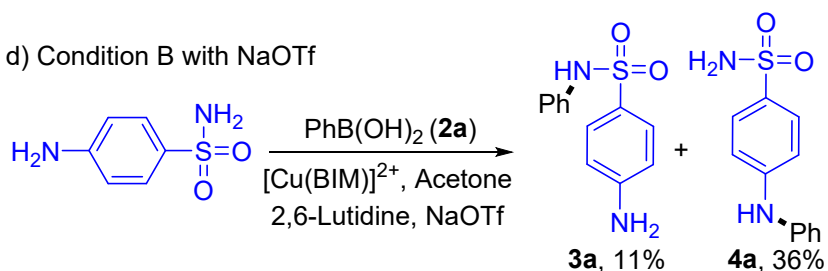

e)  $\text{Cu}^{2+}$  (0.05 mmol) source without BIM ligand in  $\text{Na}_2\text{CO}_3/\text{H}_2\text{O}$

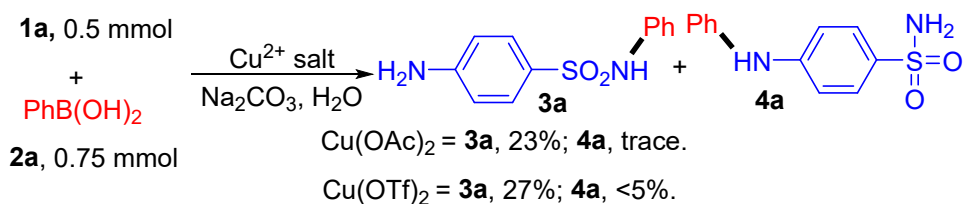

f)  $\text{Cu}^{2+}$  (0.05 mmol) source without BIM ligand in 2,6-lutidine/acetone

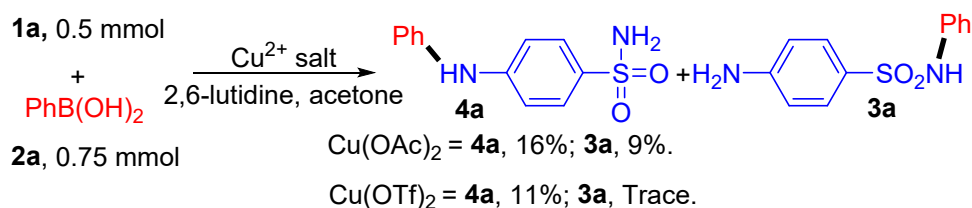

g)  $\text{Cu}^{2+}$  (0.05 mmol) source without BIM ligand in conditions A and B

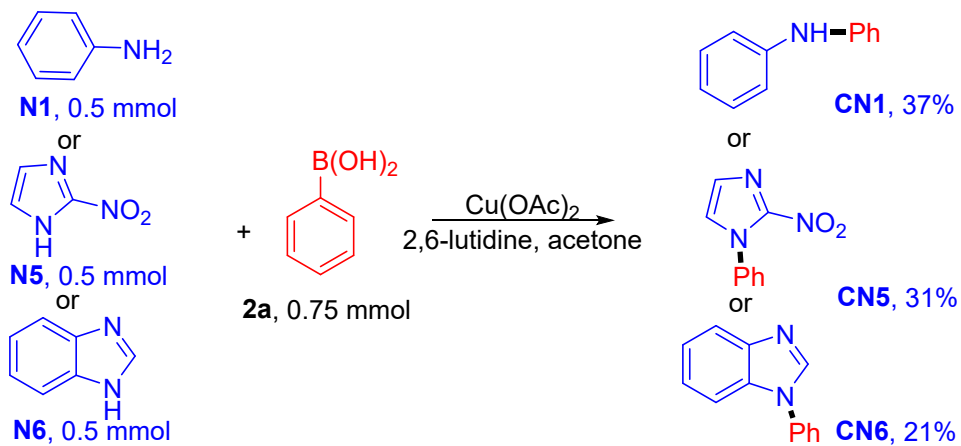

## L Base effects on % conversion

### a) Inorganic bases in acetone solvent

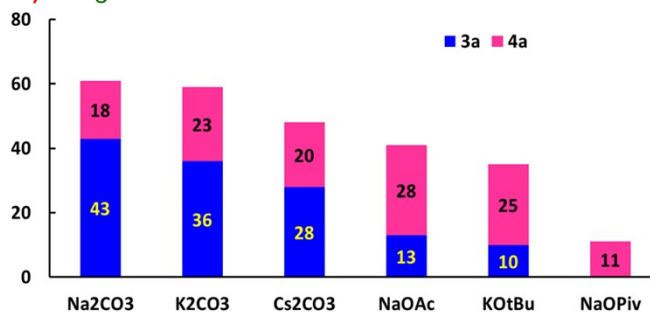

### b) Organic bases in a water solvent

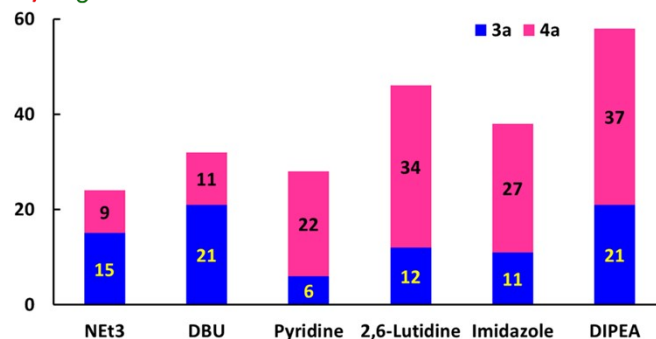

**Figure S8.** Base effects on % conversion for the *N*-arylation of 4ABSA (**1a**, 0.5 mmol) with PhB(OH)<sub>2</sub> (**2a**, 0.75 mmol), base (1.0 mmol), Cu<sup>2+</sup>BIM (0.05 mmol), and solvent (5.0 mL) at RT under open air atmosphere for 24 hours. Yields were determined using <sup>1</sup>H-NMR spectroscopy with mesitylene as an internal standard. **a)** the reaction condition for sulfonamide *N*-activation with inorganic bases in acetone solvent and **b)** the reaction condition for the arylamine *N*-activation with organic bases in water.

### M. Powder X-ray diffraction (PXRD) analysis

Powder X-ray diffraction (PXRD) analysis for the  $\text{Cu}^{2+}\text{BIM}$  fitted with the LeBail profile fitting.

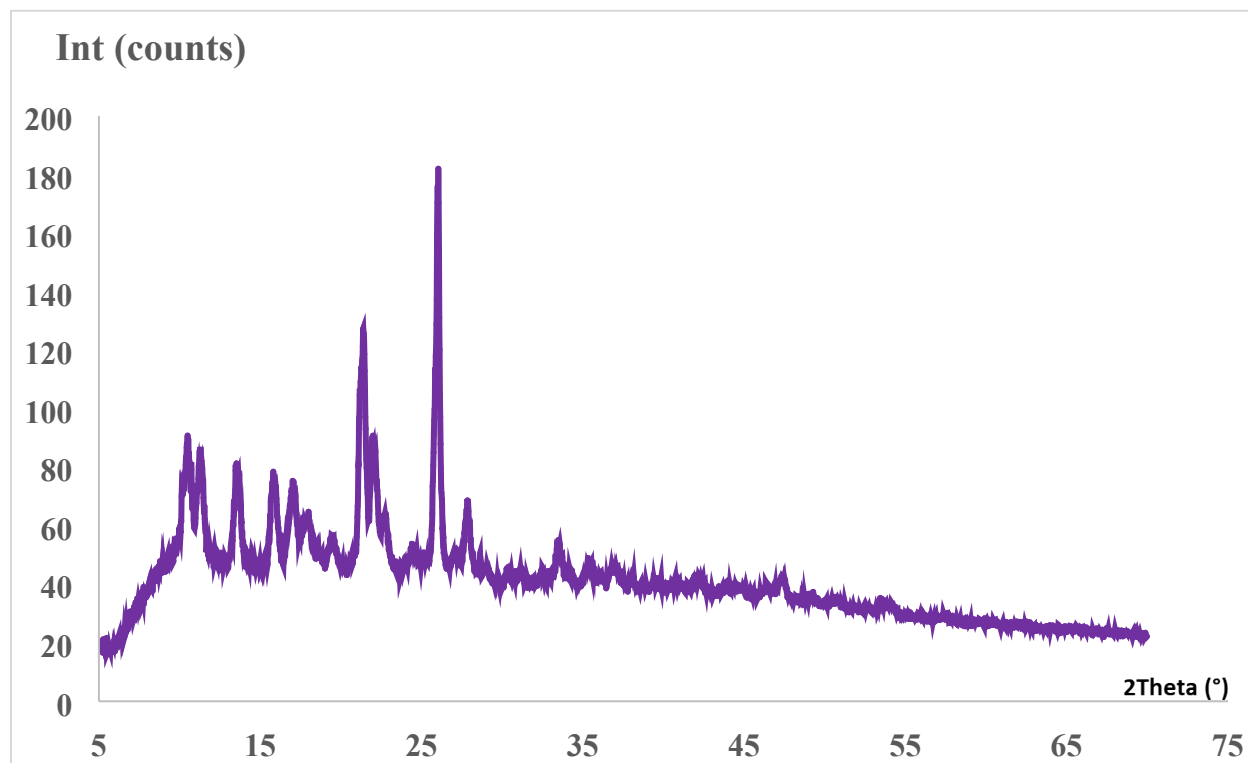

Figure S9.  $\text{Cu}^{2+}\text{BIM}$  powder XRD pattern measured.

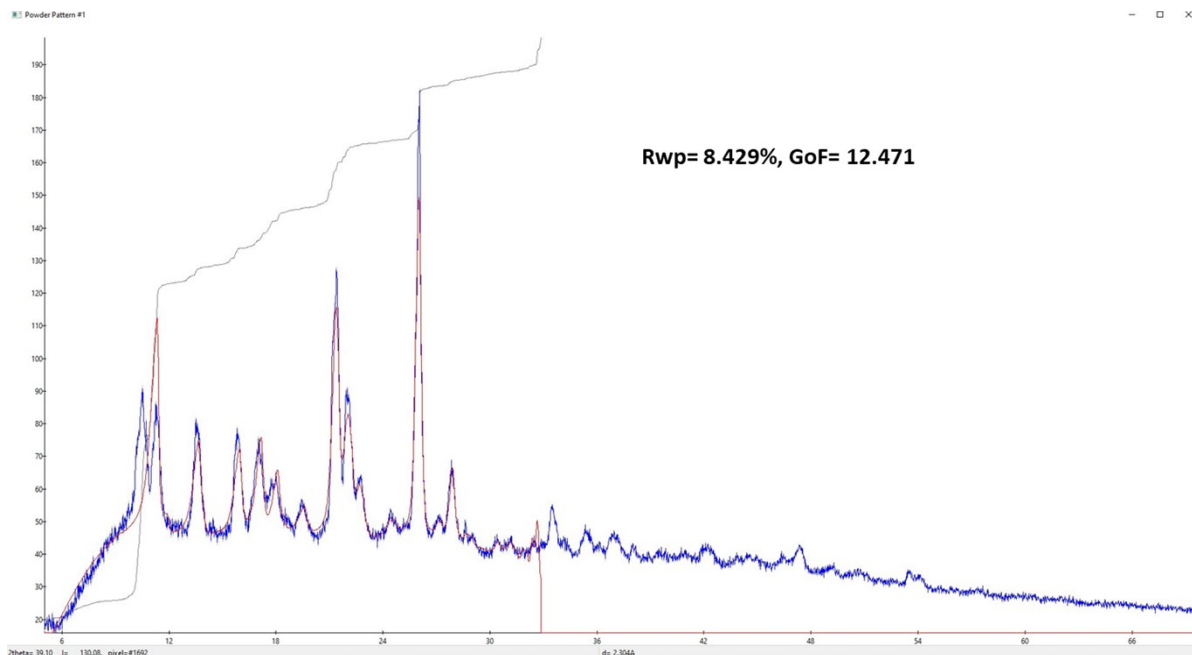

**Figure S10.**  $\text{Cu}^{2+}\text{BIM}$  LeBail refinement fitting profile of PXRD and single-XRD [Blue-measured and Red – stimulated].

| <b>Powder sample:</b>                 | <b>Single crystal:</b>                |
|---------------------------------------|---------------------------------------|
| Symmetry_space_group_name_H-M 'P -1 ' | Symmetry_space_group_name_H-M 'P -1 ' |
| a = 7.7922 Å                          | a = 7.8701 Å                          |
| b = 11.3394 Å                         | b = 11.5840 Å                         |
| c = 14.4604 Å                         | c = 14.7103 Å                         |
| $\alpha$ = 99.8853 °                  | $\alpha$ = 100.260 °                  |
| $\beta$ = 104.070 °                   | $\beta$ = 90.700 °                    |
| $\gamma$ = 97.3408 °                  | $\gamma$ = 97.224 °                   |
| volume = 1201.59 Å <sup>3</sup>       | volume = 1308.4 Å <sup>3</sup>        |

## CRYSTALLINITY REPORT

**% crystallinity: 66.31**  
**% amorphous: 33.69**  
**|| crystallinity: 278.9**  
**|| amorphous: 141.7**

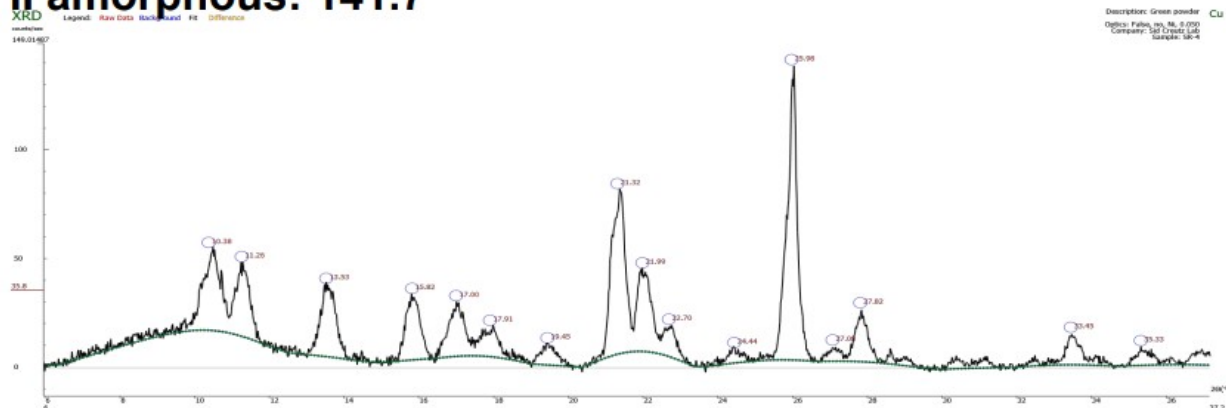

### Sample

File: 22\_08\_16\_0001\_SR-4.xml

Figure S11. Crystallinity report for the Cu<sup>2+</sup>BIM complex.

#### Sample Information:

Description: Green powder

Sample: SR-4

Company: Sid Creutz Lab

Job Number: 004

Notes:

#### Experimental Conditions:

Scan Type: Coupled

2 start (°): 5.00

2 end (°): 70.00

(step size, °): 0.02

Dwell (sec): 2

Source Soller Slit: No

Divergence Slit: 1.00 mm

Anti-Scatter Slit: no mm

Diffacted-Beam Soller Slit: No

Receiving Slit: 0.050 mm

Spinner: False

Wavelength: 1.540593

V: 30.00 kV

C: 20.00 mA

**Powder X-ray diffraction (PXRD) analysis for the Cu<sup>2+</sup>BIMA**

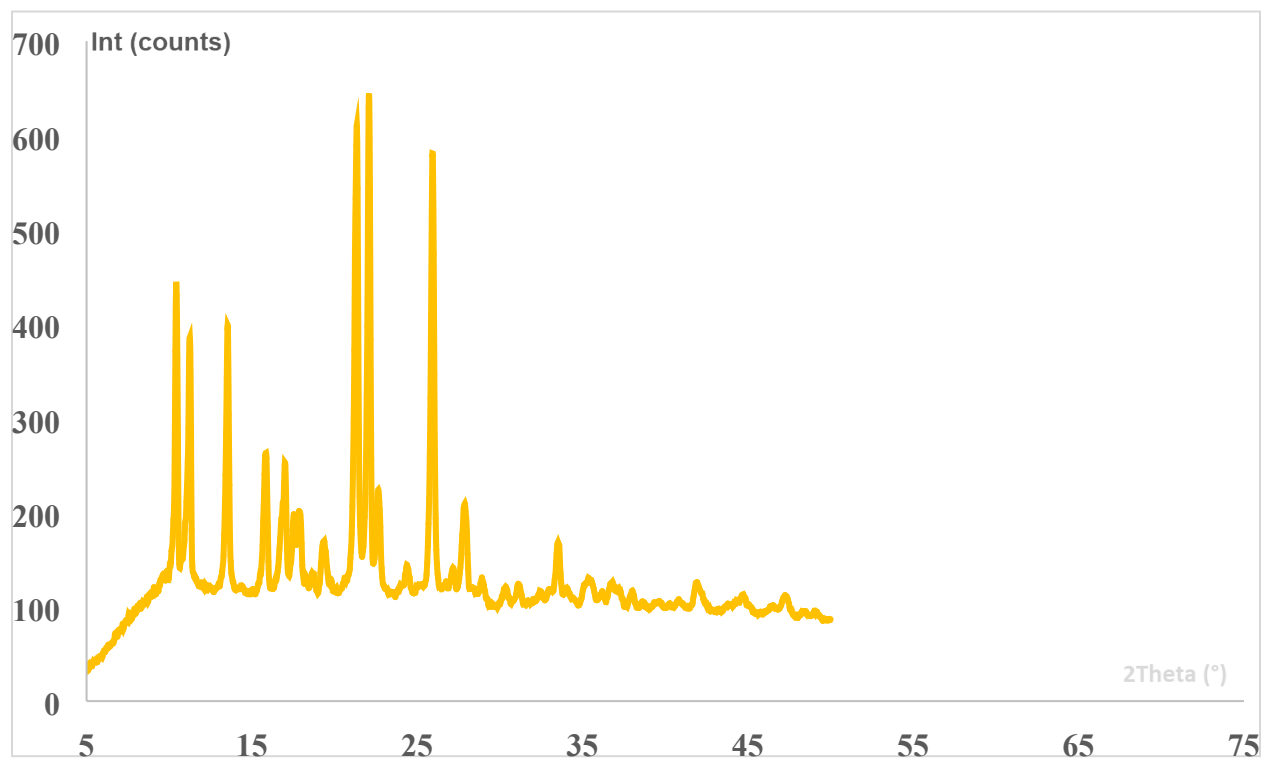

**Figure S12.** Cu<sup>2+</sup>-complex, Cu<sup>2+</sup>BIMA powder XRD pattern measured.

**M. Elemental analysis data for Cu<sup>2+</sup>BIM & Cu<sup>2+</sup>BIMA**

|                            | <b>C</b> | <b>H</b> | <b>N</b> | <b>S</b> |
|----------------------------|----------|----------|----------|----------|
| <b>Cu<sup>2+</sup>BIM</b>  | 37.98    | 2.409    | 8.45     | 9.946    |
| <b>Cu<sup>2+</sup>BIMA</b> | 39.06    | 2.413    | 8.71     | 9.872    |



## ESI-High-resolution mass spectrometry data for the Cu<sup>2+</sup>BIM and Cu<sup>2+</sup>BIMA

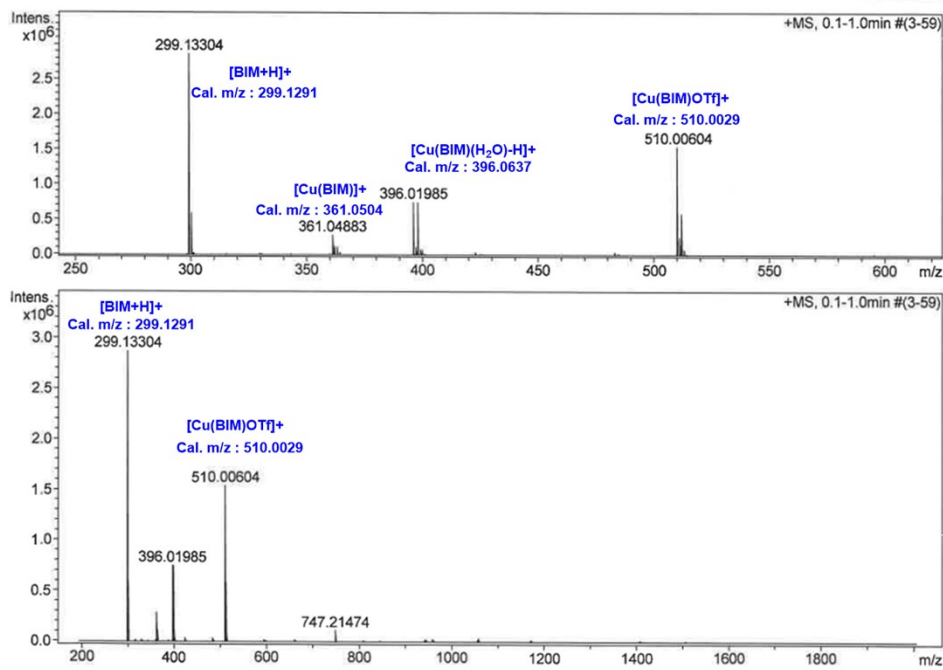

Figure S13. ESI-HRMS spectrum of Cu<sup>2+</sup>BIM complex

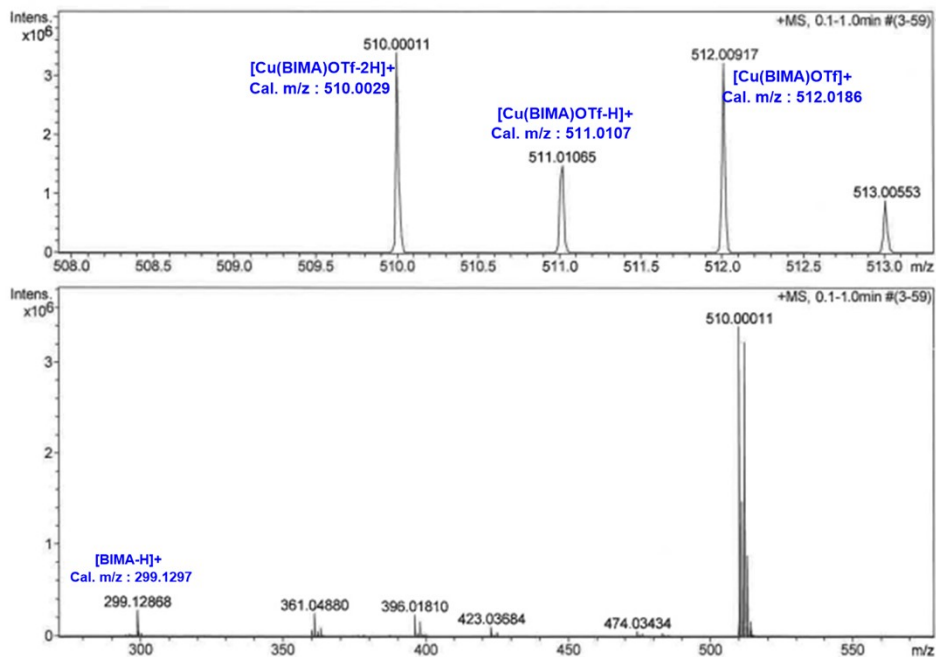

Figure S14. ESI-HRMS spectrum of Cu<sup>2+</sup>BIMA complex

## N. References:

- (1) Saluja, P.; Kaur, N.; Singh, N.; Jang, D. O. Benzimidazole-Based Fluorescent Sensors for Cr<sup>3+</sup> and Their Resultant Complexes for Sensing HSO<sub>4</sub><sup>-</sup> and F<sup>-</sup>. *Tetrahedron* **2012**, *68* (41), 8551–8556. <https://doi.org/10.1016/j.tet.2012.08.022>.
- (2) Zu, W.; Liu, S.; Jia, X.; Xu, L. Chemoselective: N -Arylation of Aminobenzene Sulfonamides via Copper Catalysed Chan-Evans-Lam Reactions. *Org Chem Front* **2019**, *6* (9), 1356–1360. <https://doi.org/10.1039/c8qo01313f>.
- (3) Salvadori, K.; Šimková, L.; Císařová, I.; Sýkora, J.; Ludvík, J.; Cuřínová, P. Sulphonamidic Groups as Electron-Withdrawing Units in Ureido-Based Anion Receptors: Enhanced Anion Complexation versus Deprotonation. *Chempluschem* **2020**, *85* (7), 1401–1411. <https://doi.org/10.1002/cplu.202000326>.
- (4) Yu, S.; Zhang, L.; Yan, S.; Wang, P.; Sanchez, T.; Christ, F.; Debyser, Z.; Neamati, N.; Zhao, G. Nitrogen-Containing Polyhydroxylated Aromatics as HIV-1 Integrase Inhibitors: Synthesis, Structure-Activity Relationship Analysis, and Biological Activity. *J Enzyme Inhib Med Chem* **2012**, *27* (5), 628–640. <https://doi.org/10.3109/14756366.2011.604851>.
- (5) Wang, X.; Ahn, Y. M.; Lentscher, A. G.; Lister, J. S.; Brothers, R. C.; Kneen, M. M.; Gerratana, B.; Boshoff, H. I.; Dowd, C. S. Design, Synthesis, and Evaluation of Substituted Nicotinamide Adenine Dinucleotide (NAD<sup>+</sup>) Synthetase Inhibitors as Potential Antitubercular Agents. *Bioorg Med Chem Lett* **2017**, *27* (18), 4426–4430. <https://doi.org/10.1016/j.bmcl.2017.08.012>.
- (6) Kumar, A. S.; Kudva, J.; Bharath, B. R.; Rai, V. M.; Kumar, S. M.; Kumar, V.; Sajankila, S. P. Synthesis, Characterization, Molecular Docking Studies and Biological Evaluation of Some Conjugated Quinazoline-Sulfonamide Scaffold. *ChemistrySelect* **2018**, *3* (48), 13586–13595. <https://doi.org/10.1002/slct.201802402>.
- (7) Kettler K; Sakowski J; Wiesner J; Ortmann R; Jomaa H; Schlitzer M. Novel Lead Structures for Antimalarial Farnesyltransferase Inhibitors. *ChemInform* **2005**, *36*, 36–90.
- (8) Luci, D. K.; Jameson, J. B.; Yasgar, A.; Diaz, G.; Joshi, N.; Kantz, A.; Markham, K.; Perry, S.; Kuhn, N.; Yeung, J.; Kerns, E. H.; Schultz, L.; Holinstat, M.; Nadler, J. L.; Taylor-Fishwick, D. A.; Jadhav, A.; Simeonov, A.; Holman, T. R.; Maloney, D. J. Synthesis and Structure–Activity Relationship Studies of 4-((2-Hydroxy-3-Methoxybenzyl)Amino)Benzenesulfonamide Derivatives as Potent and Selective Inhibitors of 12-Lipoxygenase. *J. Med. Chem* **2014**, *57*, 21. <https://doi.org/10.1021/jm4016476>.
- (9) Berzina, B.; Sokolovs, I.; Suna, E. Copper-Catalyzed Para-Selective C–H Amination of Electron-Rich Arenes. *ACS Catal* **2015**, *5*, 7008–7014. <https://doi.org/10.1021/acscatal.5b01992>.
- (10) Hsu, Y.-C.; Chen, M.-T. N-Heterocyclic Carbene Palladium(II) Amine Complexes: The Role of Primary Aryl-or Alkylamine Binding and Applications in the Buchwald-Hartwig Amination Reaction. *Eur J Inorg Chem* **2022**, *1*, e202100828. <https://doi.org/10.1002/ejic.202100828>.
- (11) Raju, S.; Sheridan, P. E.; Hauer, A. K.; Garrett, A. E.; McConnell, D. E.; Thornton, J. A.; Stokes, S. L.; Emerson, J. P. Cu-Catalyzed Chan–Evans–Lam Coupling Reactions of 2-Nitroimidazole with Aryl Boronic Acids: An Effort toward New Bioactive Agents against *S. Pneumoniae*. *Chem Biodivers* **2022**, *19*, e202200327. <https://doi.org/10.1002/cbdv.202200327>.

- (12) Silvia R; Aurelio G C. Synthesis of Di(Hetero)Arylamines from Nitrosoarenes and Boronic: A General, Mild, and Transition-Metal-Free Coupling. *Org. Lett.* **2018**, *20* (6), 1167–1671.
- (13) Saranya, S.; Radhika, S.; Anilkumar, G. Ligand- and Base-Free Cu-Catalyzed C–N Coupling of Aminoquinolines with Boronic Acids. *ChemistrySelect* **2021**, *6* (27), 6847–6850. <https://doi.org/10.1002/slct.202101932>.
- (14) Sardarian, A. R.; Kazemnejadi, M.; Esmaeilpour, M. Functionalization of Superparamagnetic Fe<sub>3</sub>O<sub>4</sub>@SiO<sub>2</sub> Nanoparticles with a Cu(II) Binuclear Schiff Base Complex as an Efficient and Reusable Nanomagnetic Catalyst for N-Arylation of  $\alpha$ -Amino Acids and Nitrogen-Containing Heterocycles with Aryl Halides. *Appl Organomet Chem* **2021**, *35* (1). <https://doi.org/10.1002/aoc.6051>.
- (15) Li, R.; Dalton, L.; Du, W.; Liu, Y.; Sun, J.; Wang, H.; Yang, G.; Zhang, D. Three Rare-Earth Incorporating 6-Peroxotantalate(4)-Selenates and Catalytic Activities for Imidation. *Dalton Trans.* **2022**, *51*, 9988–9993. <https://doi.org/10.1039/d2dt01332k>.
- (16) Berezin, A. A.; Koutentis, P. A. Ring Contraction of 1,3-Diphenylbenzo[1,2,4]-Triazinyl Radicals to 1,2-Diphenylbenzimidazoles †. *Org. Biomol. Chem* **2014**, *12*, 1641. <https://doi.org/10.1039/c3ob42130a>.
- (17) Jillella, R.; Raju, S.; Hsiao, H.-C.; Hsu, D.-S.; Chuang, S.-C. Pd-Catalyzed Redox-Neutral C–N Coupling Reaction of Iminoquinones with Electron-Deficient Alkenes without External Oxidants: Access of Tertiary (E)-Enamines and Application to the Synthesis of Indoles and Quinolin-4-Ones. *Org Lett* **2020**, *22*, 6252–6256. <https://doi.org/10.1021/acs.orglett.0c01929>.
- (18) Maiti, D.; Buchwald, S. L. Orthogonal Cu- and Pd-Based Catalyst Systems for the O- and N-Arylation of Aminophenols. *J Am Chem Soc* **2009**, *131*, 17423–17429. <https://doi.org/10.1021/ja9081815>.
- (19) Zheng, D.-Z.; Xiong, H.-G.; Song, A.-X.; Yao, H.-G.; Xu, C. Buchwald-Hartwig Amination of Aryl Esters and Chlorides Catalyzed by the Dianisole-Decorated Pd-NHC Complex. *Org. Biomol. Chem* **2022**, *20*, 2096. <https://doi.org/10.1039/d1ob02051j>.
- (20) Hong, L.; Shao, Y.; Zhang, L.; Zhou, X. Ln[N(SiMe<sub>3</sub>)<sub>2</sub>]<sub>3</sub>-Catalyzed Cross-Diinsertion of C≡N/C≡C into an N-H Bond: Facile Synthesis of 1,2,4-Trisubstituted Imidazoles from Propargylamines and Nitriles. *Chem Eur J* **2014**, *20* (28), 8551–8555. <https://doi.org/10.1002/chem.201402701>.
- (21) Chen, W.; Chen, K.; Chen, W.; Liu, M.; Wu, H. Well-Designed N-Heterocyclic Carbene Ligands for Palladium-Catalyzed Denitrative C–N Coupling of Nitroarenes with Amines. *ACS Catal* **2019**, *9*, 8110–8115. <https://doi.org/10.1021/acscatal.9b02760>.
- (22) Altman, R. A.; Buchwald, S. L. 4,7-Dimethoxy-1,10-Phenanthroline: An Excellent Ligand for the Cu-Catalyzed N-Arylation of Imidazoles. *Org Lett* **2006**, *8*, 2779–2782. <https://doi.org/10.1021/ol0608505>.
- (23) Bohigues, B.; Rojas-Buzo, S.; Moliner, M.; Corma, A. Coordinatively Unsaturated Hf-MOF-808 Prepared via Hydrothermal Synthesis as a Bifunctional Catalyst for the Tandem N-Alkylation of Amines with Benzyl Alcohol. *ACS Sustainable Chem Eng* **2022**, *9*, 15793–15806. <https://doi.org/10.1021/acssuschemeng.1c04903>.
